# Supplementary material for: Comparative Silk Transcriptomics Illuminates Distinctive Impact of Artificial Selection in Silkworm Modern Breeding
Source: MDPI journal article supplement (doi:10.3390/insects13121163), 2022-12-16
Supplement: s1 [file s1]

**Supplementary Table 3: Positive selection genes differentially expressed in improved silkworm strains**

| <b>Bmk ID</b> | <b>Gene ID</b> | <b>Gene annotation</b>                                           |
|---------------|----------------|------------------------------------------------------------------|
| BMSK0004807.1 | Bmor_03280     | Protein GDAP2 homolog, partial                                   |
| BMSK0004399.1 | Bmor_04795     | Serine/arginine repetitive matrix protein 1                      |
| BMSK0002082.1 | Bmor_05550     | Neuroguidin-like                                                 |
| BMSK0013210.1 | Bmor_07031     | Organic cation transporter protein isoform X1                    |
| BMSK0012180.1 | Bmor_12065     | A disintegrin and metalloproteinase with thrombospondin motifs 7 |
