# Supplementary material for: Comparative Silk Transcriptomics Illuminates Distinctive Impact of Artificial Selection in Silkworm Modern Breeding
Source: MDPI journal article supplement (doi:10.3390/insects13121163), 2022-12-16
Supplement: s1 [file s1]

**Supplementary Table 1: Statistics of RNA-seq data and mapping rate**

| <b>ID</b> | <b>Clean_reads</b> | <b>Clean_data(bp)</b> | <b>Mapping<br/>rate</b> | <b>Accession Number</b> |
|-----------|--------------------|-----------------------|-------------------------|-------------------------|
| <b>W1</b> | <b>31,442,000</b>  | <b>10,331,415,588</b> | <b>70.96%</b>           | <b>SRR6476552</b>       |
| <b>W2</b> | <b>31,710,704</b>  | <b>11,107,735,274</b> | <b>64.32%</b>           | <b>SRR1592738</b>       |
| <b>W3</b> | <b>28,534,127</b>  | <b>9,371,817,498</b>  | <b>73.44%</b>           | <b>SRR6476548</b>       |
| <b>W4</b> | <b>24,894,384</b>  | <b>8,170,702,308</b>  | <b>73.91%</b>           | <b>SRR6476599</b>       |
| <b>L1</b> | <b>26,867,168</b>  | <b>8,821,721,028</b>  | <b>77.35%</b>           | <b>SRR6476546</b>       |
| <b>L2</b> | <b>29,706,661</b>  | <b>9,758,753,718</b>  | <b>84.84%</b>           | <b>SRR6476594</b>       |
| <b>L3</b> | <b>30,202,803</b>  | <b>9,922,480,578</b>  | <b>87.17%</b>           | <b>SRR6476598</b>       |
| <b>L4</b> | <b>24,789,438</b>  | <b>8,136,070,128</b>  | <b>84.86%</b>           | <b>SRR6476551</b>       |
| <b>I1</b> | <b>21,692,839</b>  | <b>6,583,482,042</b>  | <b>70.14%</b>           | <b>SRR22571455*</b>     |
| <b>I2</b> | <b>29,739,625</b>  | <b>9,025,572,505</b>  | <b>75.93%</b>           | <b>SRR22571456*</b>     |
| <b>I3</b> | <b>24,592,537</b>  | <b>7,463,507,771</b>  | <b>61.94%</b>           | <b>SRR22571457*</b>     |
| <b>I4</b> | <b>25,016,234</b>  | <b>7,592,079,339</b>  | <b>70.24%</b>           | <b>SRR22571454*</b>     |

\*data were generated by this study.
