# Supplementary material for: Comparative Silk Transcriptomics Illuminates Distinctive Impact of Artificial Selection in Silkworm Modern Breeding
Source: MDPI journal article supplement (doi:10.3390/insects13121163), 2022-12-16
Supplement: s1 [file s1]

# GALACTOSE METABOLISM

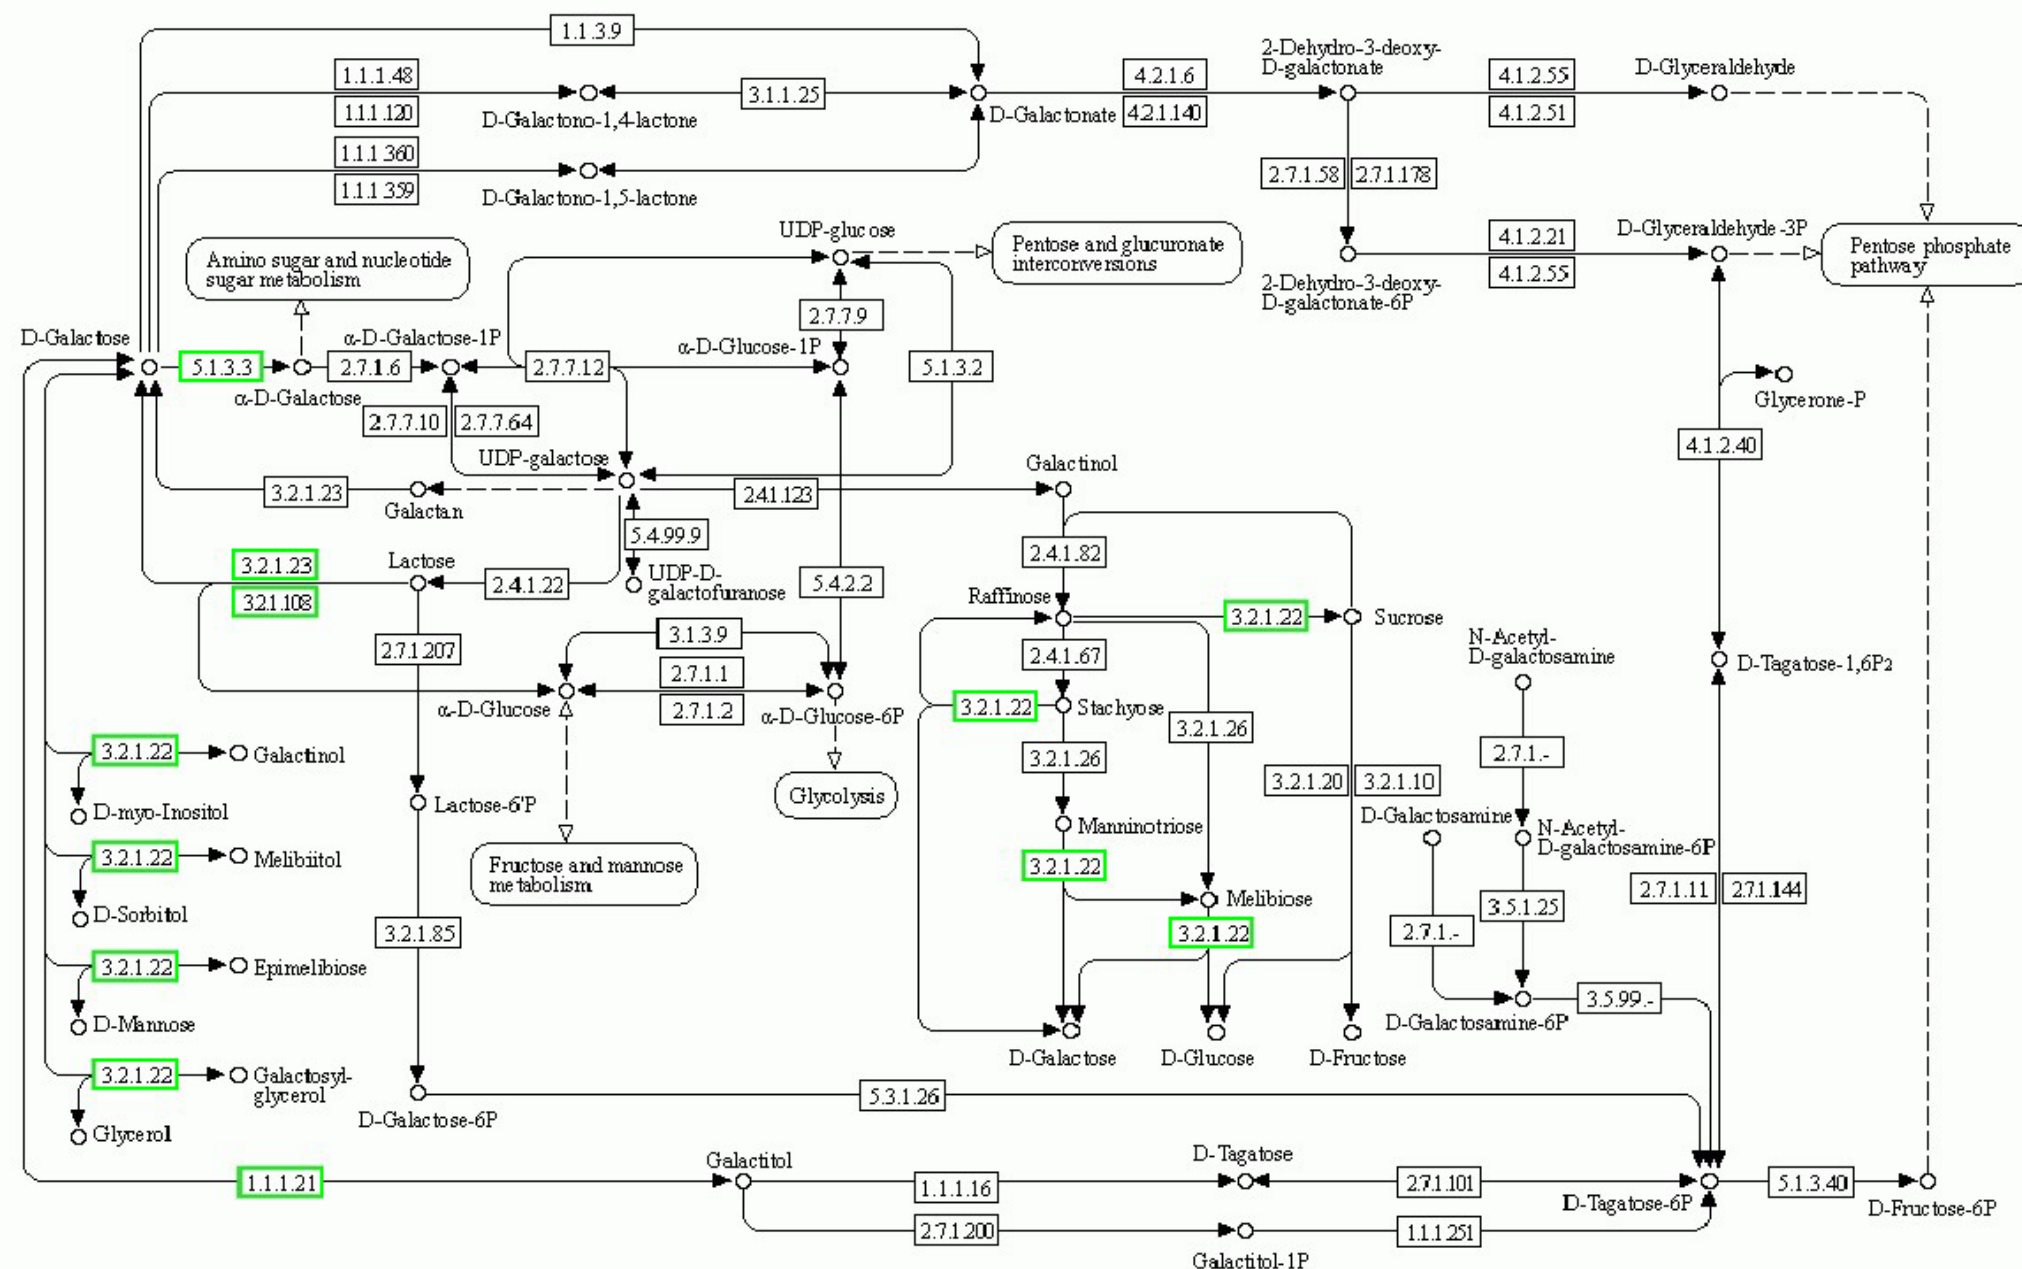

Figure S2. The galactose metabolism pathway. The green box indicates that the gene (α-N-acetylgalactosaminidase precursor) bearing the α-galactosidase [EC: 3.2.1.22] may participate in the reaction.
