# Supplementary material for: Comparative Silk Transcriptomics Illuminates Distinctive Impact of Artificial Selection in Silkworm Modern Breeding
Source: MDPI journal article supplement (doi:10.3390/insects13121163), 2022-12-16
Supplement: s1 [file s1]

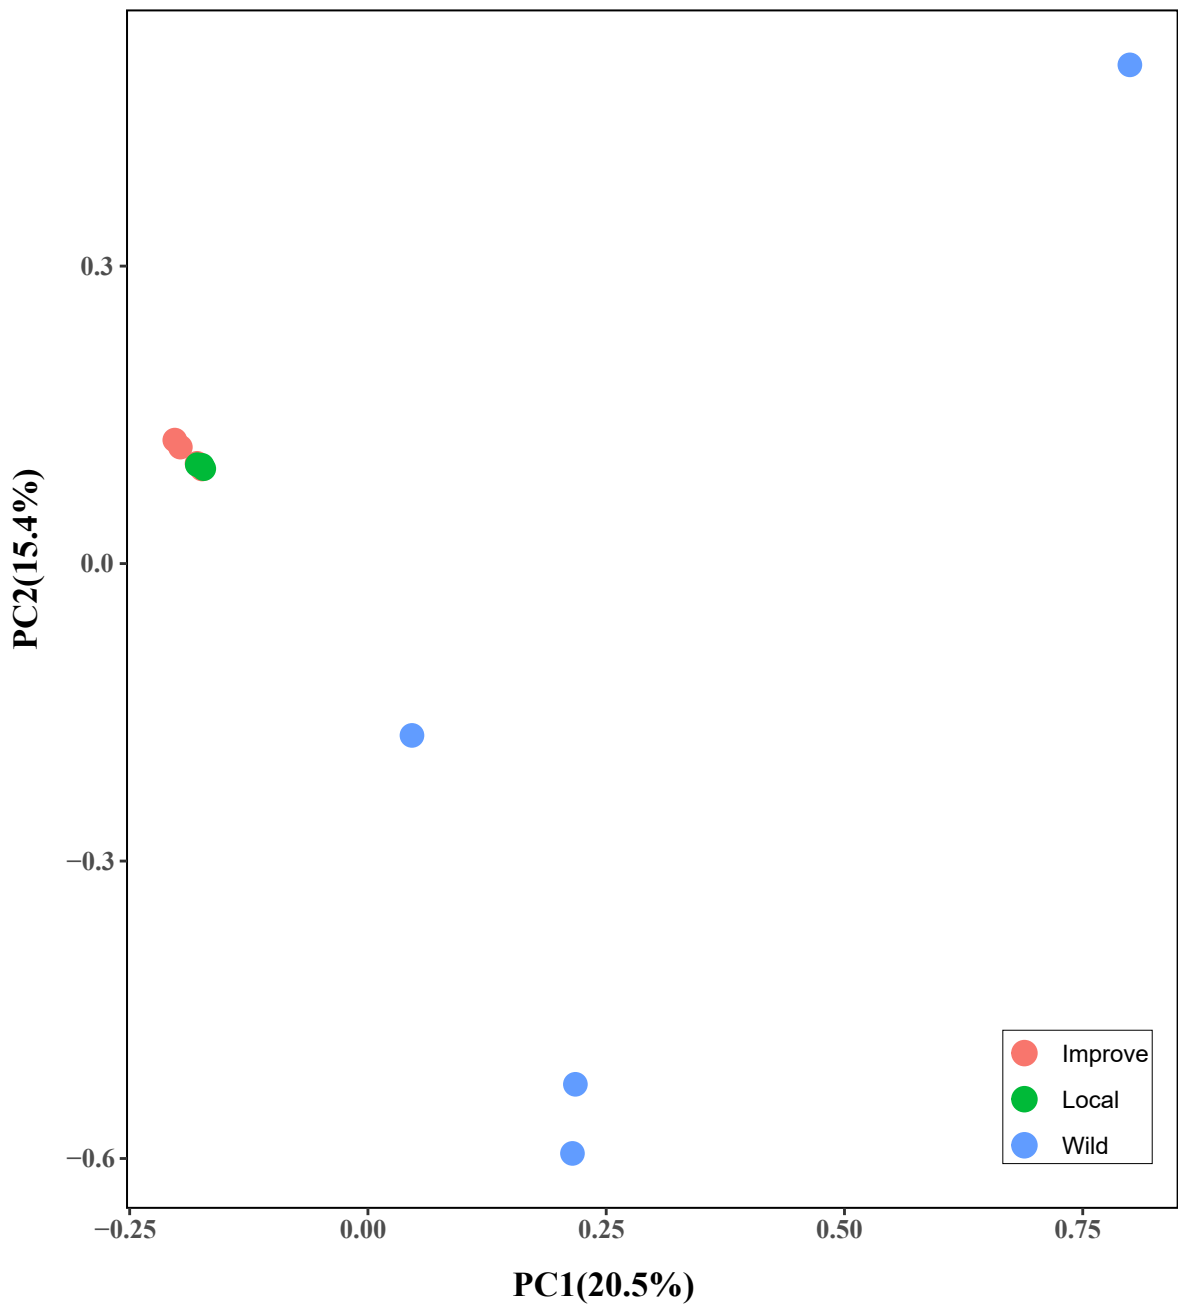

Figure S1. The PCA map constructed based on transcriptome data of all sequenced strains. Improve, the improved silkworm (*Bombyx mori*) strains; Local, the early domesticated silkworm (*B. mori*) strains; Wild, the wild silkworm (*B. mandarina*) different geographical individuals.
