# Supplementary material for: Comparative Silk Transcriptomics Illuminates Distinctive Impact of Artificial Selection in Silkworm Modern Breeding
Source: MDPI journal article supplement (doi:10.3390/insects13121163), 2022-12-16
Supplement: s1 [file s1]

**A**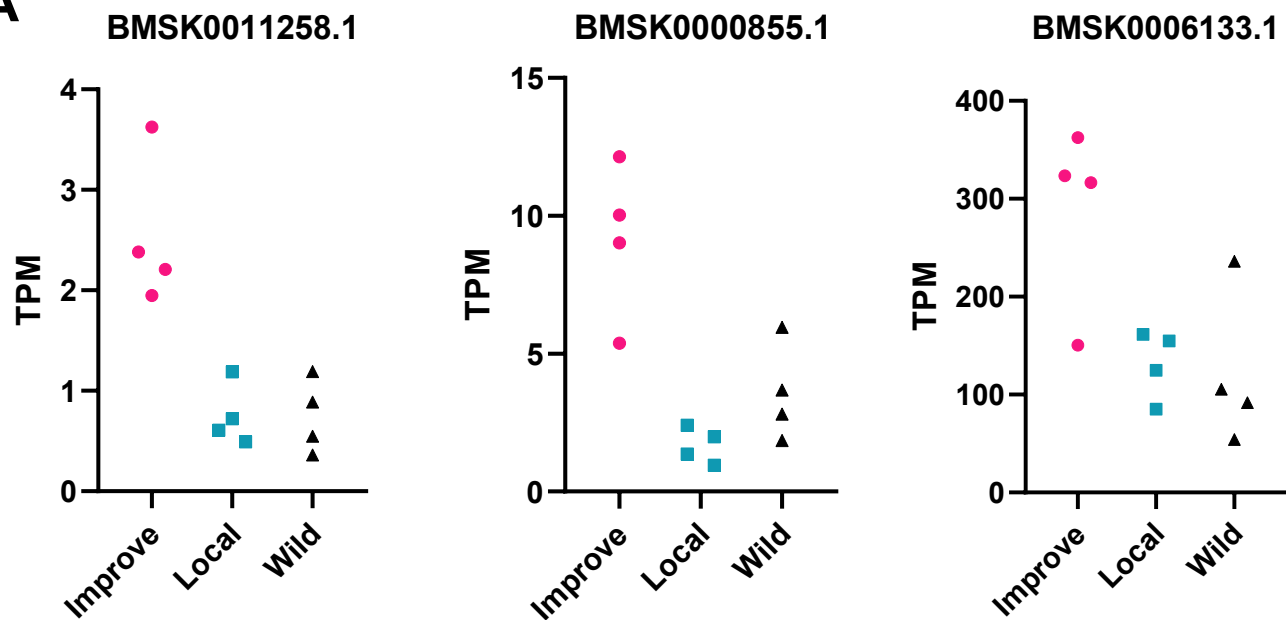**B**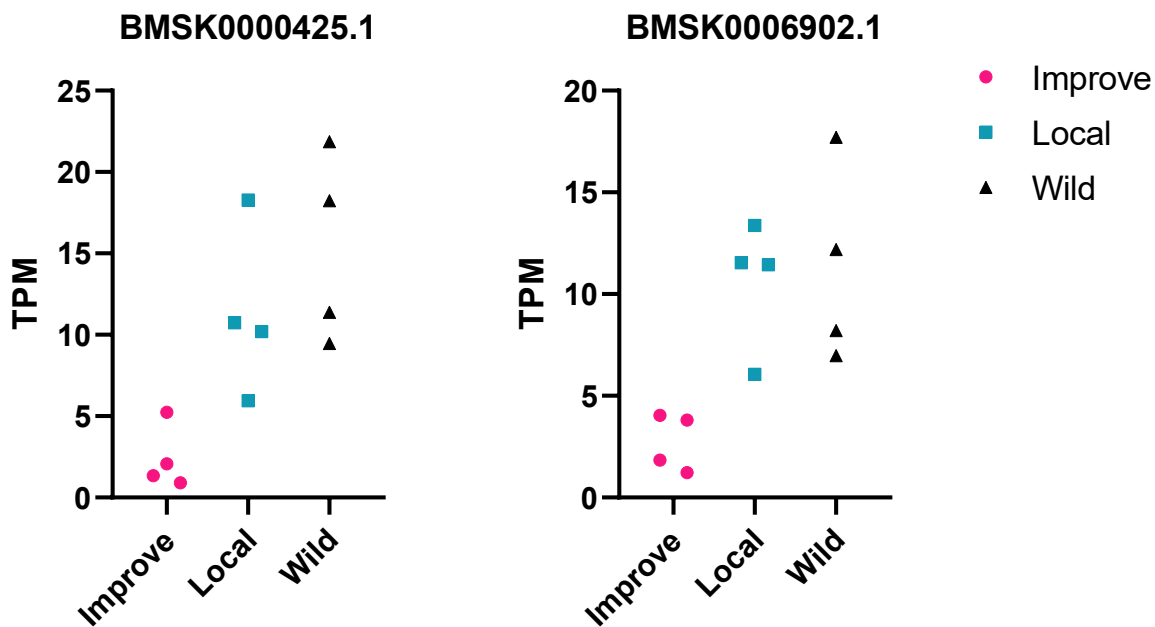

Figure S3. Expression of three up-regulated (one GalNAcase; two GalNAcTs) and two (GalNAcTs) down-regulated genes in different silkworm groups. Improve, the im-proved silkworm (*Bombyx mori*) strains; Local, the early domesticated silkworm (*B. mori*) strains; Wild, the wild silkworm (*B. mandarina*) different geographical individuals.
