# Supplementary material for: Comparative Silk Transcriptomics Illuminates Distinctive Impact of Artificial Selection in Silkworm Modern Breeding
Source: Insects. 2022 Dec 16;13(12):1163. doi: 10.3390/insects13121163 (PMC9784016; doi:10.3390/insects13121163)
Supplement: Supplementary file 1 [file insects-13-01163-s001.zip]

Archive with 6 entries (6 files):
- Fig S1.pdf
- Fig S2.pdf
- Fig S3.pdf
- Supplementary Table 1.pdf
- Supplementary Table 2.xlsx
- Supplementary Table 3.pdf
