# Supplementary material for: Comparative Silk Transcriptomics Illuminates Distinctive Impact of Artificial Selection in Silkworm Modern Breeding
Source: Insects. 2022 Dec 16;13(12):1163. doi: 10.3390/insects13121163 (PMC9784016; doi:10.3390/insects13121163)
Supplement: Supplementary file 1 [file insects-13-01163-s001.zip › Supplementary Table 2.xlsx]

## Sheet: Sheet1
SupplementaryTable 2: Information of the 1671 IS-DEGs.
	Gene_ID	Gene annotation
Up-regulated
	BMSK0007555.1	branched-chain-amino-acid aminotransferase, cytosolic
	BMSK0006627.1	neuropeptide receptor A10
	BMSK0005582.1	XP 012544682.1 uncharacterized protein LOC101743020 isoform X1
	BMSK0003446.1	protein toll
	BMSK0005833.1	adhesion G-protein coupled receptor G2
	BMSK0013793.1	AFO09967.1 IBP2
	BMSK0015122.1	facilitated trehalose transporter Tret1-2 homolog
	BMSK0006883.1	glucose dehydrogenase
	BMSK0009627.1	cytochrome P450 3A19
	BMSK0009953.1
	BMSK0010493.1	XP 004928152.1 uncharacterized protein LOC101744658
	BMSK0012601.1	cuticular protein RR-2 motif 106 precursor
	BMSK0004108.1	solute carrier organic anion transporter family member 2A1
	BMSK0006891.1	cGMP-dependent 3',5'-cyclic phosphodiesterase-like
	BMSK0003294.1	neuroparsin isoform X1
	BMSK0002575.1	lysine-specific demethylase 6A isoform X2
	BMSK0000877.1	uncharacterized protein LOC105842585
	BMSK0000807.1	Trehalase
	BMSK0010344.1	ADH16749.1 flavin-dependent monooxygenase FMO3A
	BMSK0013035.1	XP 004927154.1 organic cation transporter protein isoform X2
	BMSK0003874.1	chitinase precursor
	BMSK0005638.1	cytochrome P450
	BMSK0015595.1	AAK06407.2 alpha-crystallin, partial
	BMSK0011841.1	Glycosyl hydrolase family 1
	BMSK0001193.1	sex determination protein fruitless-like isoform X3
	BMSK0007284.1	chitooligosaccharidolytic beta-N-acetylglucosaminidase isoform X1
	BMSK0013023.1	organic cation transporter protein-like
	BMSK0002591.1	sequestosome-1 isoform X2
	BMSK0015594.1	ACM24338.1 heat shock protein 20.8
	BMSK0005758.1	23 kDa integral membrane protein-like
	BMSK0012511.1	uncharacterized protein LOC101746732
	BMSK0000310.1	glutamine synthetase 2 cytoplasmic isoform X2
	BMSK0004075.1	chitinase isoform X1
	BMSK0015907.1	XP 021209292.1 multiple C2 and transmembrane domain-containing protein 1 isoform X4
	BMSK0008668.1	uncharacterized protein LOC105842023
	BMSK0004703.1
	BMSK0005597.1
	BMSK0014682.1	XP 004924569.1 beta-mannosidase
	BMSK0001215.1	uncharacterized protein LOC101737397
	BMSK0013133.1
	BMSK0002613.1	SLIT and NTRK-like protein 4
	BMSK0006830.1	uncharacterized protein LOC101742944
	BMSK0003939.1	CDC42 small effector 2-like protein
	BMSK0000997.1	uncharacterized protein LOC105842576
	BMSK0011150.1	glutamyl-tR amidotransferase subunit B
	BMSK0003519.1	CCR4-NOT transcription complex subunit 6 isoform X2
	BMSK0011600.1	transcription factor Sox-17-alpha-A
	BMSK0000104.1	uncharacterized protein LOC101742856 isoform X2
	BMSK0002916.1	atlastin
	BMSK0002182.1
	BMSK0000268.1	juvenile hormone resistence protein II
	BMSK0015071.1	protein Skeletor, isoforms B/C
	BMSK0004737.1
	BMSK0011578.1	clavesin-2-like isoform X1
	BMSK0015685.1	histone lysine demethylase PHF8-like isoform X2
	BMSK0003082.1	hypothetical protein TcasGA2 TC034914, partial
	BMSK0001535.1	uncharacterized protein LOC101740269
	BMSK0008700.1	EF-hand domain-containing protein 1-like
	BMSK0001140.1	uncharacterized protein LOC105841624 isoform X2
	BMSK0008699.1
	BMSK0009353.1	vacuolar protein sorting-associated protein 33A-like
	BMSK0009625.1	cytochrome P450 3A19-like
	BMSK0015683.1	facilitated trehalose transporter Tret1-like
	BMSK0012126.1
	BMSK0004829.1	pickpocket protein 28-like
	BMSK0011840.1	Glycosyl hydrolase family 1
	BMSK0015223.1	uncharacterized protein LOC105202492
	BMSK0000518.1	uncharacterized protein LOC101740699 isoform X1
	BMSK0006069.1	heat shock protein 68-like
	BMSK0006042.1	pheromone biosynthesis activating neuropeptide
	BMSK0015432.1	uncharacterized protein LOC106130651
	BMSK0000517.1	uncharacterized protein LOC101740840
	BMSK0006071.1	putative aminopeptidase W07G4.4
	BMSK0003524.1	CCR4-NOT transcription complex subunit 6 isoform X2
	BMSK0004696.1	protein singed wings 2 isoform X2
	BMSK0012200.1	Ubiquitin family
	BMSK0004527.1	matrix metalloproteinase-14-like
	BMSK0008923.1	uncharacterized protein LOC106707832 isoform X1
	BMSK0003488.1	kal-1 protein isoform X2
	BMSK0000084.1	quinone oxidoreductase isoform X1
	BMSK0005577.1	carboxypeptidase A2 isoform X2
	BMSK0013348.1	TB2/DP1, HVA22 family
	BMSK0001267.1	Uncharacterized protein OBRU01 08609
	BMSK0015840.1
	BMSK0001888.1	alpha-tocopherol transfer protein-like
	BMSK0007755.1	uncharacterized protein LOC101742398
	BMSK0013016.1	organic cation transporter protein-like isoform X2
	BMSK0007395.1	organic cation transporter protein-like
	BMSK0012130.1	XP 004929642.1 uncharacterized protein LOC101735803
	BMSK0002640.1	erythrocyte carbonic anhydrase
	BMSK0009023.1	probable cytochrome P450 9f2
	BMSK0003816.1	serine protease inhibitor 12 isoform X1
	BMSK0011144.1	putative uncharacterized protein DDB G0282499
	BMSK0003813.1	serine protease inhibitor 11 precursor
	BMSK0004704.1	uncharacterized protein LOC106133170 isoform X2
	BMSK0015059.1	Thiol=disulfide interchange protein DsbA
	BMSK0014596.1	XP 021209258.1 zinc carboxypeptidase A 1
	BMSK0002258.1	alpha amylase
	BMSK0000535.1
	BMSK0000007.1	adenylate cyclase type 6
	BMSK0000009.1	adenylate cyclase type 1-like, partial
	BMSK0011258.1	alpha-N-acetylgalactosaminidase precursor
	BMSK0013978.1
	BMSK0010942.1	protein wech
	BMSK0011441.1	organic cation transporter 1-like
	BMSK0008015.1	uncharacterized protein LOC101735633
	BMSK0002423.1
	BMSK0003022.1
	BMSK0015639.1
	BMSK0010669.1	uncharacterized protein LOC105386977
	BMSK0009100.1
	BMSK0011678.1	uncharacterized protein LOC101744460 isoform X1
	BMSK0005666.1	putative alpha-L-fucosidase
	BMSK0002984.1	Down syndrome cell adhesion molecule-like protein Dscam2
	BMSK0009441.1	phospholipase A2-like isoform X2
	BMSK0004872.1	uncharacterized protein LOC101735549 isoform X3
	BMSK0013354.1	lysine-specific demethylase 3B
	BMSK0010006.1	hypothetical protein RR46 09944
	BMSK0014839.1	Mo-molybdopterin cofactor sulfurase
	BMSK0011987.1	sorbitol dehydrogenase
	BMSK0005004.1	olfactory receptor 60 isoform X1
	BMSK0009106.1	nucleoredoxin-like
	BMSK0009105.1
	BMSK0015146.1	XP 012551695.1 mushroom body large-type Kenyon cell-specific protein 1 isoform X2
	BMSK0008684.1	multidrug resistance-associated protein 4
	BMSK0002474.1	solute carrier organic anion transporter family member 2A1-like isoform X1
	BMSK0005450.1	ecdysone receptor A isoform specific region, partial
	BMSK0002480.1	Organic Anion Transporter Polypeptide (OATP) family
	BMSK0013572.1
	BMSK0011370.1	XP 004924250.1 transcription factor sem-2
	BMSK0014788.1	zinc transporter ZIP1
	BMSK0010425.1	lectin 5 precursor
	BMSK0008609.1	Amino acid permease
	BMSK0011371.1	XP 012544182.1 uncharacterized protein LOC105841345
	BMSK0015385.1	XP 021203619.1 uncharacterized protein LOC110385177
	BMSK0009659.1	estradiol 17-beta-dehydrogenase 8-like isoform X1
	BMSK0013571.1	Solute carrier family 22 member 13
	BMSK0010299.1	XP 004933848.1 15-hydroxyprostaglandin dehydrogenase
	BMSK0012820.1	piggyBac transposable element-derived protein 3-like, partial
	BMSK0011670.1	XP 012545169.1 calbindin-32
	BMSK0006695.1	retinol dehydrogenase 11-like
	BMSK0006068.1	uncharacterized protein LOC105841957
	BMSK0006070.1	uncharacterized protein LOC101745063
	BMSK0015198.1
	BMSK0000448.1
	BMSK0008090.1	uncharacterized protein LOC106137322
	BMSK0005834.1	uncharacterized protein LOC105842347
	BMSK0002296.1
	BMSK0006868.1	putative fatty acyl-CoA reductase CG5065 isoform X2
	BMSK0012221.1	XP 004929694.1 endophilin-A isoform X2
	BMSK0009624.1	cytochrome P450 CYP6AE7
	BMSK0011842.1	myrosinase 1-like
	BMSK0003759.1	ChaC-like protein
	BMSK0008033.1	cytochrome P450, partial
	BMSK0005039.1	uncharacterized protein LOC101740358 isoform X3
	BMSK0007509.1
	BMSK0001861.1	uncharacterized protein LOC106127448
	BMSK0008220.1	brain tumor protein
	BMSK0009439.1	peripheral-type benzodiazepine receptor-associated protein 1 isoform X6
	BMSK0011372.1
	BMSK0011839.1	myrosinase 1-like
	BMSK0005925.1	uncharacterized protein LOC106137545
	BMSK0007955.1
	BMSK0014786.1	ZIP Zinc transporter
	BMSK0007422.1	proton-coupled amino acid transporter 4-like
	BMSK0008518.1	nuclear receptor GRF
	BMSK0012963.1	uncharacterized protein LOC101742676 isoform X1
	BMSK0001613.1
	BMSK0012717.1	XP 021207484.1 PR domain zinc finger protein 1 isoform X2
	BMSK0014801.1	trichohyalin-like
	BMSK0004222.1	lipase 1
	BMSK0016069.1
	BMSK0007272.1	ATP-binding cassette sub-family G member 1, partial
	BMSK0014055.1	ABF51339.1 ferritin isoform 1
	BMSK0011680.1	Centrosome-associated C terminus
	BMSK0005818.1	leucine-rich repeat flightless-interacting protein 2
	BMSK0012558.1
	BMSK0006685.1	uncharacterized protein LOC101738865 isoform X2
	BMSK0014659.1	XP 021209233.1 autophagy-related protein 2 homolog A
	BMSK0006878.1	TBC1 domain family member 15 isoform X3
	BMSK0002636.1	phosphatidate phosphatase LPIN2 isoform X3
	BMSK0007972.1	lysoplasmalogenase-like protein TMEM86A
	BMSK0008123.1
	BMSK0005576.1	beta-galactosidase
	BMSK0002377.1	cytochrome b5
	BMSK0003520.1	Uncharacterized protein OBRU01 01059
	BMSK0010708.1	uncharacterized protein LOC106713951 isoform X1
	BMSK0001862.1	venom dipeptidyl peptidase 4-like
	BMSK0002922.1	insulin receptor isoform X2
	BMSK0004556.1	nuclear protein 1
	BMSK0012515.1	XP 004931997.1 ATP-binding cassette sub-family G member 5 isoform X2
	BMSK0005591.1	R binding protein fox-1 homolog 2 isoform X3
	BMSK0014135.1
	BMSK0014465.1	suppressor of fused homolog
	BMSK0010415.1	XP 021203506.1 zinc finger protein 77 isoform X2
	BMSK0007520.1	gamma-aminobutyric acid receptor subunit beta-like
	BMSK0013501.1	XP 012549720.1 fibroinase isoform X1
	BMSK0015253.1	XP 021204150.1 uncharacterized protein LOC101743340
	BMSK0011094.1	uncharacterized protein LOC106132668 isoform X2
	BMSK0007302.1	blastopia polyprotein
	BMSK0003465.1	uncharacterized protein LOC101739819 isoform X2
	BMSK0000685.1	os protein
	BMSK0009912.1
	BMSK0004149.1	TRAS3
	BMSK0003227.1	calexcitin-2-like
	BMSK0012438.1	reverse transcriptase
	BMSK0012607.1	cuticular protein RR-2 motif 100 precursor
	BMSK0003727.1	endonuclease-reverse transcriptase HmRTE-e01
	BMSK0011603.1	gamma-tubulin complex component 2-like isoform X2
	BMSK0010279.1	XP 004932581.1 leucine-rich repeats and immunoglobulin-like domains protein sma-10
	BMSK0009940.1	craniofacial development protein 2-like
	BMSK0003085.1	synaptic vesicle glycoprotein 2A
	BMSK0004965.1	ovarian serine protease
	BMSK0010764.1	hypothetical protein KGM 22710
	BMSK0015818.1	uncharacterized protein LOC101745983 isoform X5
	BMSK0011186.1	neuropeptide receptor A20
	BMSK0013359.1	protease inhibitor 1 precursor
	BMSK0004026.1	zinc finger protein with KRAB and SCAN domains 8
	BMSK0005169.1	uncharacterized protein LOC101738673
	BMSK0000747.1	uncharacterized protein LOC101741243
	BMSK0015195.1	XP 004933069.2 amine sulfotransferase
	BMSK0005291.1
	BMSK0003349.1	IQ and ubiquitin-like domain-containing protein
	BMSK0011393.1	serine protease precursor
	BMSK0007066.1	synaptotagmin I isoform A
	BMSK0004643.1	formin-like protein CG32138 isoform X2
	BMSK0006851.1	neutral ceramidase-like
	BMSK0010781.1	uncharacterized protein LOC101744177 isoform X1
	BMSK0008670.1
	BMSK0002477.1	putative cuticle protein CPG32
	BMSK0006895.1	T18197 reverse transcriptase-like protein - silkworm
	BMSK0014519.1	AMP deaminase 2-like
	BMSK0006867.1	putative fatty acyl-CoA reductase CG5065
	BMSK0015563.1	XP 021204083.1 latrophilin Cirl
	BMSK0013389.1	ACG61190.1 serpin-27, partial
	BMSK0003304.1	serine protease-like protein isoform X1
	BMSK0011854.1	myrosinase 1-like
	BMSK0000530.1	uncharacterized protein LOC106717090
	BMSK0013484.1	XP 012549726.1 thymosin isoform X1
	BMSK0002945.1
	BMSK0002944.1	TNFSF13
	BMSK0002947.1
	BMSK0003007.1	small heat shock protein
	BMSK0002614.1	putative cuticle protein
	BMSK0000204.1	pleiotrophin-like protein isoform X1
	BMSK0015557.1	endothelin-converting enzyme 1
	BMSK0015958.1
	BMSK0012525.1	XP 021207464.1 uncharacterized protein LOC110386198
	BMSK0008112.1	tektin-1
	BMSK0003054.1	uncharacterized protein LOC101738294
	BMSK0003938.1	serine/threonine-protein kinase PRP4 homolog isoform X3
	BMSK0002668.1	uncharacterized protein LOC101739749 isoform X2
	BMSK0011193.1	testis-specific serine/threonine-protein kinase 3-like isoform X1
	BMSK0001044.1	uncharacterized protein LOC101746943
	BMSK0007532.1	cingulin-like
	BMSK0009991.1	ubiquitin carboxyl-terminal hydrolase 7-like isoform X1
	BMSK0009003.1	beta-tubulin
	BMSK0001522.1	slowpoke-binding protein
	BMSK0005427.1	alpha-scruin-like
	BMSK0014003.1	XP 004926711.1 uncharacterized protein LOC101735603
	BMSK0004719.1	uncharacterized protein LOC106142321
	BMSK0012889.1	XP 021204307.1 alpha-tubulin isoform X1
	BMSK0007533.1	filamin-A-interacting protein 1-like
	BMSK0007185.1	kelch-like protein 10 isoform X6
	BMSK0014693.1	XP 004924568.2 uncharacterized protein LOC101741659
	BMSK0000391.1
	BMSK0000610.1	aldose 1-epimerase isoform X1
	BMSK0000933.1	uncharacterized protein LOC105842577
	BMSK0001621.1	dynein intermediate chain 3, ciliary
	BMSK0010581.1	hypothetical protein KGM 10110
	BMSK0015334.1	XP 021204120.1 uncharacterized protein LOC101740351
	BMSK0015151.1	XP 004933042.1 uncharacterized protein LOC101738866
	BMSK0001061.1	uncharacterized protein LOC101736358
	BMSK0000498.1	uncharacterized protein LOC106130495
	BMSK0005855.1	Uncharacterized protein OBRU01 15439
	BMSK0013857.1	XP 021202041.1 uncharacterized protein LOC101742629
	BMSK0008026.1	uncharacterized protein LOC101736304
	BMSK0000029.1	Mitochondrial processing peptidase beta subunit
	BMSK0006381.1	uncharacterized protein LOC110386139
	BMSK0012704.1	glutamine synthetase 2 cytoplasmic-like
	BMSK0000618.1	uncharacterized protein LOC101738910
	BMSK0014694.1	XP 021202584.1 uncharacterized protein LOC101741242 isoform X2
	BMSK0010199.1	uncharacterized protein LOC101745403
	BMSK0014612.1	hypothetical protein KGM 08993
	BMSK0006320.1	hypothetical protein KGM 22112
	BMSK0010011.1	hypothetical protein RR48 12930
	BMSK0007781.1	uncharacterized protein LOC101741632
	BMSK0004923.1	uncharacterized protein LOC106134608
	BMSK0012202.1	tubulin polyglutamylase TTLL13-like
	BMSK0000063.1	protein KBP homolog
	BMSK0015427.1
	BMSK0014756.1	testis-specific serine/threonine-protein kinase-like
	BMSK0001532.1	uncharacterized protein LOC101740400 isoform X2
	BMSK0012026.1	XP 012545353.1 uncharacterized protein LOC101742731
	BMSK0015178.1	XP 004933056.1 uncharacterized protein LOC101740893
	BMSK0003116.1	uncharacterized protein LOC106134809
	BMSK0003852.1	tetratricopeptide repeat protein 25-like
	BMSK0013713.1	uncharacterized protein LOC106142077
	BMSK0014472.1	uncharacterized protein LOC106720878 isoform X1
	BMSK0000922.1	uncharacterized protein LOC101736595 isoform X1
	BMSK0003135.1	arginine/serine-rich coiled-coil protein 2 isoform X2
	BMSK0014473.1	KWMTBOMO14903
	BMSK0015494.1	XP 004923603.1 wiskott-Aldrich syndrome protein family member 1
	BMSK0009911.1
	BMSK0012533.1	hypothetical protein KGM 13043
	BMSK0003517.1	heat shock protein 68
	BMSK0015663.1	phospholipid scramblase
	BMSK0015886.1	XP 004933579.1 uncharacterized protein LOC101738637
	BMSK0011410.1	XP 004927381.1 facilitated trehalose transporter Tret1-like
	BMSK0005856.1	hypothetical protein KGM 13532
	BMSK0000969.1	uncharacterized protein LOC106101784
	BMSK0000569.1	uncharacterized protein LOC101747011
	BMSK0000570.1	protamine-2
	BMSK0003072.1	alpha-crystallin A chain
	BMSK0013672.1	cysteine and glycine-rich protein 3-like
	BMSK0001016.1	uncharacterized protein LOC106138567
	BMSK0000635.1	succinate dehydrogenase [ubiquinone] flavoprotein subunit, mitochondrial-like isoform X1
	BMSK0001708.1	uncharacterized protein LOC100862767
	BMSK0001412.1	carboxypeptidase B isoform X4
	BMSK0002076.1	WW domain-containing oxidoreductase-like isoform X1
	BMSK0009718.1	uncharacterized protein LOC101740060 isoform X2
	BMSK0000091.1	tubulin alpha-1 chain-like
	BMSK0001540.1	uncharacterized protein LOC110384922
	BMSK0002360.1
	BMSK0008064.1	integument esterase 2 precursor
	BMSK0009311.1	uncharacterized protein LOC101739547
	BMSK0013617.1	uncharacterized protein LOC101741500
	BMSK0001536.1	uncharacterized protein LOC101739953
	BMSK0000107.1	uncharacterized protein LOC105842500
	BMSK0010308.1	major royal jelly protein 1-like
	BMSK0006713.1	ABJ09465.1 immune-related protein
	BMSK0005583.1	Chitinase-related protein 1
	BMSK0009577.1	clavesin-1 isoform X2
	BMSK0008162.1	uncharacterized protein LOC106136424
	BMSK0009643.1	uncharacterized protein LOC101738429
	BMSK0010616.1	XP 012547617.1 apoptosis-stimulating of p53 protein 1
	BMSK0002691.1	transmembrane protease serine 9
	BMSK0006983.1	ATP-binding cassette sub-family G member 1
	BMSK0009298.1	uncharacterized protein LOC106709932
	BMSK0003385.1	Uncharacterized protein OBRU01 09048
	BMSK0004650.1	kinesin-like protein KIF12
	BMSK0005765.1	uncharacterized protein LOC101740169
	BMSK0001437.1	class E basic helix-loop-helix protein 40
	BMSK0004871.1	serine proteinase
	BMSK0006624.1	glucose dehydrogenase
	BMSK0001028.1	KWMTBOMO00969
	BMSK0002983.1	alcohol dehydrogenase 2
	BMSK0002299.1	HMG (high mobility group) box
	BMSK0014734.1	XP 004934367.1 cystathionine beta-synthase
	BMSK0006874.1	Protein dachsous
	BMSK0002905.1	alkaliphilic serine protease P-IIc=trypsin-like protease
	BMSK0001903.1	centrosomin isoform X2
	BMSK0001032.1	uncharacterized protein LOC101736617
	BMSK0005042.1	myrosinase 1-like
	BMSK0000264.1	tyrosine hydroxylase
	BMSK0006465.1	Bomopsin2, partial
	BMSK0013054.1	XP 004927149.1 uncharacterized protein LOC101740411
	BMSK0010494.1	XP 021205036.1 uncharacterized protein LOC101745240 isoform X2
	BMSK0011572.1
	BMSK0000935.1	uncharacterized protein LOC101736997 isoform X2
	BMSK0009630.1	cytochrome P450 6ae2
	BMSK0013273.1	ionotropic glutamate receptor
	BMSK0009297.1	vanin-like protein 2 isoform X1
	BMSK0013394.1	Catalase, partial
	BMSK0013272.1	glutamate receptor ionotropic, kainate 2-like
	BMSK0002923.1	uncharacterized protein LOC101737593
	BMSK0006628.1	neuropeptide receptor A11
	BMSK0000961.1	uncharacterized protein LOC100902684
	BMSK0012818.1	XP 021204231.1 serine protease inhibitor 28 isoform X2
	BMSK0013300.1	Uncharacterized protein OBRU01 01183
	BMSK0015832.1	putative ferric-chelate reductase 1 homolog
	BMSK0010189.1	extracellular serine/threonine protein CG31145 isoform X1
	BMSK0002298.1	transcription factor Sox-21-B
	BMSK0013599.1	zinc-containing alcohol dehydrogenase
	BMSK0003032.1	short-chain dehydrogenase/reductase family 16C member 6 isoform X1
	BMSK0002673.1
	BMSK0000514.1
	BMSK0009263.1	cellular retinaldehyde-binding protein
	BMSK0008116.1	aldose 1-epimerase
	BMSK0005490.1
	BMSK0013809.1	XP 012543783.1 heterogeneous nuclear ribonucleoprotein L isoform X1
	BMSK0015073.1	XP 004933010.1 shootin-1
	BMSK0010585.1	protein sprint isoform X4
	BMSK0006301.1	beta-1,3-glucan recognition protein 2 precursor
	BMSK0006896.1	hypothetical protein RR48 11400
	BMSK0009279.1	glucose dehydrogenase
	BMSK0007283.1	low density lipoprotein receptor isoform X1
	BMSK0006894.1	uncharacterized protein LOC101740376
	BMSK0012012.1	XP 004925626.1 clavesin-2
	BMSK0003322.1	homeobox protein Hox-B3-like
	BMSK0006427.1	N-alpha-acetyltransferase 60 isoform X2
	BMSK0014651.1	uncharacterized protein LOC101741141 isoform X1
	BMSK0014654.1	uncharacterized protein LOC101741141 isoform X3
	BMSK0004755.1	probable allantoicase isoform X1
	BMSK0004421.1	protein alan shepard isoform X3
	BMSK0008541.1	CTL-like protein 2 isoform X1
	BMSK0014933.1	BAH83641.1 prospero, partial
	BMSK0014931.1	XP 021202506.1 homeobox protein prospero isoform X1
	BMSK0001801.1	transcription factor Sox-2
	BMSK0009651.1	sarcoplasmic calcium-binding protein
	BMSK0006504.1	purine nucleoside phosphorylase-like isoform X2
	BMSK0011621.1	ras-responsive element-binding protein 1
	BMSK0013276.1	cytosolic purine 5'-nucleotidase isoform X2
	BMSK0000516.1	AMP-activated protein kinase gamma subunit
	BMSK0013580.1	probable multidrug resistance-associated protein lethal(2)03659
	BMSK0014916.1	XP 004921799.1 egl nine homolog 1
	BMSK0014915.1	hypothetical protein KGM 18340
	BMSK0001062.1	uncharacterized protein LOC106101399
	BMSK0008502.1	PDZ domain-containing protein 8 isoform X2
	BMSK0008278.1	protein Fe65 homolog isoform X2
	BMSK0000410.1	multidrug resistance protein homolog 49
	BMSK0004807.1	protein GDAP2 homolog isoform X2
	BMSK0014340.1	UDP-glycosyltransferase UGT41A2 precursor
	BMSK0001051.1	protein prune homolog 2
	BMSK0007227.1	Sugar (and other) transporter
	BMSK0004754.1	acid sphingomyelinase-like phosphodiesterase 3a isoform X2
	BMSK0013049.1	juvenile hormone binding protein e96h-0303 precursor
	BMSK0015533.1	XP 004923610.1 nuclear factor interleukin-3-regulated protein
	BMSK0001750.1	lysosomal thioesterase PPT2 homolog
	BMSK0014650.1	uncharacterized protein LOC101741141 isoform X3
	BMSK0006869.1	Uncharacterized protein OBRU01 18342
	BMSK0005990.1	uncharacterized protein LOC101735722
	BMSK0005992.1	uncharacterized protein LOC101735722
	BMSK0009561.1	carboxypeptidase B-like
	BMSK0005452.1	ecdysone receptor, partial
	BMSK0000777.1	pyruvate dehydrogenase kinase
	BMSK0007233.1
	BMSK0007234.1	ATP-binding cassette transporter subfamily G member Bm3
	BMSK0009640.1	coiled-coil domain-containing protein 42 homolog
	BMSK0007228.1	synaptic vesicle glycoprotein 2C isoform X2
	BMSK0005117.1	xaa-Pro aminopeptidase 1
	BMSK0005015.1	speckle-type POZ protein isoform X1
	BMSK0010713.1	Ubiquitin-like domain
	BMSK0010712.1	tubulin-specific chaperone cofactor E-like protein isoform X2
	BMSK0014136.1	slit, partial
	BMSK0006739.1	tektin-3-like
	BMSK0007431.1	Zinc finger protein jing-like
	BMSK0006314.1	uncharacterized protein LOC106121342
	BMSK0011052.1	ABF51491.1 vesicle amine transport protein
	BMSK0004888.1	uncharacterized protein LOC101737722
	BMSK0010841.1	XP 004927006.1 muskelin isoform X1
	BMSK0007354.1	venom protease-like isoform X2
	BMSK0012197.1	XP 004929673.1 tyrosine-protein kinase CSK isoform X3
	BMSK0001436.1	enhancer of split mbeta protein-like
	BMSK0002943.1	uncharacterized protein LOC106129803
	BMSK0010194.1	voltage-dependent T-type calcium channel subunit alpha-1G
	BMSK0004802.1	carbonic anhydrase 7
	BMSK0001309.1	arylphorin subunit beta-like
	BMSK0010024.1	putative inorganic phosphate cotransporter
	BMSK0002866.1	uncharacterized protein LOC101747221 isoform X1
	BMSK0012556.1	innexin 3
	BMSK0013050.1	juvenile hormone binding protein an-0128 precursor
	BMSK0008106.1	uncharacterized protein LOC101740122 isoform X1
	BMSK0015265.1
	BMSK0000977.1	histone H4-like, partial
	BMSK0016055.1	spatzle 6
	BMSK0009407.1	fatty acid-binding protein, muscle-like
	BMSK0002063.1	junctophilin-1 isoform X1
	BMSK0010382.1	uncharacterized protein LOC101746142
	BMSK0002065.1	uncharacterized protein LOC106720006 isoform X2
	BMSK0003391.1
	BMSK0002062.1	MORN repeat
	BMSK0010583.1	gamma-interferon-inducible lysosomal thiol reductase-like
	BMSK0004162.1	Major Facilitator Superfamily
	BMSK0004161.1	putative inorganic phosphate cotransporter
	BMSK0015592.1	heat shock protein hsp 19.9
	BMSK0015794.1
	BMSK0002030.1	Bm2-cadherin, partial
	BMSK0005975.1	gelsolin-like
	BMSK0012317.1	XP 021202909.1 cytochrome P450 6B1
	BMSK0014332.1	AAD10243.1 cytochrome oxidase subunit I, partial (mitochondrion)
	BMSK0014331.1	UDP-glycosyltransferase UGT41A1 precursor
	BMSK0006952.1
	BMSK0004738.1	hypothetical protein TcasGA2 TC034914, partial
	BMSK0001010.1	uncharacterized protein LOC101741935
	BMSK0008418.1
	BMSK0015377.1	XP 012545779.1 type I inositol 1,4,5-trisphosphate 5-phosphatase isoform X1
	BMSK0005600.1
	BMSK0010554.1
	BMSK0015483.1
	BMSK0003147.1	organic cation/carnitine transporter 7-like
	BMSK0002409.1	solute carrier organic anion transporter family member 4A1
	BMSK0015156.1	facilitated trehalose transporter Tret1-like
	BMSK0002040.1	aromatic-L-amino-acid decarboxylase
	BMSK0006408.1	glycogen-binding subunit 76A isoform X3
	BMSK0006045.1	leishmanolysin-like peptidase isoform X3
	BMSK0013792.1	hypothetical protein TcasGA2 TC034914, partial
	BMSK0004553.1	gamma-glutamyltranspeptidase 1 isoform X2
	BMSK0009128.1	uncharacterized protein LOC101739604 isoform X1
	BMSK0002493.1	probable peroxisomal acyl-coenzyme A oxidase 1
	BMSK0002555.1	seroin 1 precursor
	BMSK0013149.1
	BMSK0005933.1	BCL2/adenovirus E1B 19 kDa protein-interacting protein 3
	BMSK0014056.1	ABF51285.1 ferritin
	BMSK0004811.1	Uncharacterized protein OBRU01 26877, partial
	BMSK0002647.1	myosin-2 heavy chain
	BMSK0000855.1	acetylglucosaminyltransferase
	BMSK0010468.1	MAGUK p55 subfamily member 5-like
	BMSK0005087.1	V-type proton ATPase 116 kDa subunit a
	BMSK0008350.1	transcription factor E74, partial
	BMSK0003165.1	putative transporter ZK637.1
	BMSK0014787.1	ZIP Zinc transporter
	BMSK0002202.1	clavesin-1
	BMSK0013520.1	XP 004930731.1 ankyrin-3
	BMSK0014213.1	XP 021209114.1 protein enabled isoform X4
	BMSK0004681.1	amyloid protein-binding protein 2
	BMSK0015631.1	facilitated trehalose transporter Tret1-like
	BMSK0011129.1	Solute carrier family 46 member 3
	BMSK0002648.1	sialic acid synthase
	BMSK0014629.1	Protein distal antenna
	BMSK0010136.1	sodium-independent sulfate anion transporter-like
	BMSK0013130.1
	BMSK0000980.1	UDP-glucoronosyl and UDP-glucosyl transferase
	BMSK0000981.1	UDP-glycosyltransferase UGT33R2 precursor
	BMSK0013875.1	proton-coupled amino acid transporter 2-like
	BMSK0010339.1	XP 012546252.1 uncharacterized protein LOC105841696 isoform X2
	BMSK0008722.1	UDP-glucuronic acid decarboxylase 1
	BMSK0012579.1	cuticular protein RR-2 motif 128 precursor
	BMSK0010297.1	15-hydroxyprostaglandin dehydrogenase
	BMSK0001923.1	Uncharacterized protein OBRU01 01001, partial
	BMSK0002203.1
	BMSK0014838.1	zinc finger FYVE domain-containing protein 26 homolog isoform X1
	BMSK0008352.1
	BMSK0012454.1
	BMSK0008570.1
	BMSK0008569.1	kynurenine formamidase isoform X1
	BMSK0009278.1	glucose dehydrogenase
	BMSK0005676.1	protein Tob1
	BMSK0008861.1	pancreatic triacylglycerol lipase-like
	BMSK0010582.1	venom protease isoform X2
	BMSK0010003.1	putative inorganic phosphate cotransporter
	BMSK0001660.1	sodium/potassium-transporting ATPase subunit beta-1-like isoform X2
	BMSK0010094.1	putative homeodomain transcription factor, partial
	BMSK0011708.1	XP 012552187.1 UPF0183 protein CG7083
	BMSK0007444.1	uncharacterized protein LOC101744657
	BMSK0006009.1	zinc finger protein 28-like
	BMSK0000312.1	leucine-rich repeat-containing G-protein coupled receptor 4
	BMSK0000375.1
	BMSK0002504.1	uncharacterized protein LOC105841862
	BMSK0011683.1	extensin-3-like
	BMSK0015012.1	XP 021202293.1 neurexin-1 isoform X4
	BMSK0014371.1	AFK93534.1 hemolymph protein 14
	BMSK0009126.1	uncharacterized protein DDB G0287625-like
	BMSK0015828.1	calcium-independent phospholipase A2-gamma-like
	BMSK0003941.1	trypsin-like proteinase
	BMSK0004601.1	G-protein coupled receptor Mth2-like
	BMSK0010260.1	uncharacterized protein LOC106142705
	BMSK0011404.1	solute carrier family 2, facilitated glucose transporter member 6-like
	BMSK0001000.1	seminal fluid protein CSSFP006
	BMSK0012500.1	catalase-like
	BMSK0006948.1	cadherin-23
	BMSK0007001.1	uncharacterized protein LOC101743036
	BMSK0010120.1	cathepsin B precursor
	BMSK0015478.1	XP 012546210.1 uncharacterized protein LOC101746761
	BMSK0011495.1	centrosomal protein of 104 kDa
	BMSK0006046.1	pollen-specific leucine-rich repeat extensin-like protein 2
	BMSK0006389.1
	BMSK0015673.1	facilitated trehalose transporter Tret1-like
	BMSK0011511.1	low molecular mass 30 kDa lipoprotein 19G1-like precursor
	BMSK0008025.1	KWMTBOMO08249
	BMSK0002029.1	neural-cadherin isoform X2
	BMSK0006655.1	sperm motility kinase isoform X2
	BMSK0000978.1	late histone H2B.L4-like
	BMSK0011948.1	BAM73889.1 cytochrome P450
	BMSK0016048.1	XP 012544286.1 hydroxylysine kinase
	BMSK0014660.1	XP 012552280.1 autophagy-related protein 2 homolog B
	BMSK0004557.1
	BMSK0011748.1
	BMSK0007633.1	LIM domain only protein 3
	BMSK0002256.1	maltase 2
	BMSK0015824.1	XP 021208537.1 protein Wnt-7b isoform X2
	BMSK0005040.1	cytochrome b5-related protein-like
	BMSK0010341.1	Zinc knuckle
	BMSK0010296.1	3-hydroxyisobutyrate dehydrogenase isoform X1
	BMSK0005985.1
	BMSK0006054.1	uncharacterized protein LOC101744060
	BMSK0009596.1	aldo-keto reductase AKR2E4-like
	BMSK0005113.1	mannosyl-oligosaccharide alpha-1,2-mannosidase isoform A isoform X2
	BMSK0012979.1	XP 021202411.1 R -binding protein 47 isoform X2
	BMSK0012023.1	XP 021208759.1 uncharacterized protein LOC110386615
	BMSK0001999.1
	BMSK0003501.1	C3 and PZP-like alpha-2-macroglobulin domain-containing protein 8
	BMSK0000956.1	transcription factor CP2-like protein 1 isoform X1
	BMSK0015689.1	nose resistant to fluoxetine protein 6-like
	BMSK0009658.1	uncharacterized protein LOC101737760
	BMSK0009024.1	uncharacterized protein LOC101739297 isoform X4
	BMSK0009749.1	ecdysone oxidase
	BMSK0001679.1	calumenin-A isoform X2
	BMSK0009626.1	Cytochrome P450
	BMSK0000979.1	UDP-glycosyltransferase UGT33R1 precursor
	BMSK0003464.1	zonadhesin-like isoform X1
	BMSK0015375.1	ebony protein
	BMSK0015780.1	vanin-like protein 3
	BMSK0000998.1	aldo-keto reductase AKR2E4-like
	BMSK0010378.1	sodium-independent sulfate anion transporter-like
	BMSK0009299.1	cytosolic 10-formyltetrahydrofolate dehydrogenase
	BMSK0013218.1	hypothetical protein KGM 18695
	BMSK0010699.1	hypothetical protein KGM 10985
	BMSK0010698.1	FEZ-like protein
	BMSK0013274.1	uncharacterized protein LOC106136946
	BMSK0013738.1	dehydrogenase/reductase SDR family member 4
	BMSK0001030.1	KWMTBOMO00971
	BMSK0001601.1	alaserpin-like
	BMSK0001602.1	uncharacterized protein LOC101739125 isoform X3
	BMSK0010359.1
	BMSK0006145.1	ribonuclease E
	BMSK0010148.1	yellow-b
	BMSK0006438.1
	BMSK0006133.1
	BMSK0006583.1	uncharacterized protein LOC101741741
	BMSK0015674.1	facilitated trehalose transporter Tret1-like
	BMSK0008215.1	silk fibroin light chain
	BMSK0003228.1	hypothetical protein OCBIM 22037288mg
	BMSK0014114.1	protein phosphatase 1 regulatory subunit 3B-B
	BMSK0007964.1	uncharacterized protein LOC101739490
	BMSK0015028.1	nephrin-like
	BMSK0006144.1	heart- and neural crest derivatives-expressed protein 2 isoform X2
	BMSK0012552.1
	BMSK0003234.1	uncharacterized protein LOC105842252 isoform X1
	BMSK0005697.1	fringe
	BMSK0008351.1
	BMSK0001329.1	EF-hand domain-containing protein D2 homolog
	BMSK0002393.1
	BMSK0002432.1	uncharacterized protein LOC110385201
Down-regulated
	BMSK0009430.1	actin related protein 2/3 complex subunit 4
	BMSK0006765.1
	BMSK0012792.1	cytochrome c-type heme lyase isoform X1
	BMSK0012532.1	ribosome biogenesis protein TSR3 homolog
	BMSK0011174.1	XP 021205970.1 microtubule-associated protein RP/EB family member 3 isoform X3
	BMSK0009270.1	elongator complex protein 5
	BMSK0015446.1	fumarylacetoacetase
	BMSK0010031.1	DH dehydrogenase (ubiquinone) 1 beta subcomplex 10
	BMSK0012480.1	uracil phosphoribosyltransferase homolog
	BMSK0015115.1
	BMSK0014175.1	Oligonucleotide/oligosaccharide-binding (OB)-fold
	BMSK0001111.1	nucleoside diphosphate kinase 6-like isoform X1
	BMSK0013628.1	DH dehydrogenase
	BMSK0005585.1	XP 021202737.1 tR methyltransferase 10 homolog A, partial
	BMSK0013227.1	putative proteasome complex
	BMSK0014887.1	XP 004921819.1 UPF0692 protein CG33108 isoform X1
	BMSK0014273.1	porphobilinogen deaminase
	BMSK0002326.1	septum formation protein Maf isoform X1
	BMSK0014529.1	XP 012545467.2 patj homolog
	BMSK0004382.1	replication protein A2
	BMSK0003724.1	putative peptidyl-prolyl cis-trans isomerase dodo isoform X2
	BMSK0003998.1	mitochondria-associated granulocyte macrophage CSF signaling molecule
	BMSK0008656.1	collagen alpha-2(VIII) chain
	BMSK0015295.1	ABN09649.1 nucleoplasmin-like protein
	BMSK0015382.1	ABF51387.1 nucleolar protein family A member 2
	BMSK0009725.1	peptidyl-tR hydrolase ICT1, mitochondrial-like
	BMSK0009848.1	Sr protein
	BMSK0004335.1	proteasome activator complex subunit 3
	BMSK0008561.1	glutathione transferase zeta
	BMSK0013577.1
	BMSK0004541.1	gag-polypeptide of LTR copia-type
	BMSK0003607.1	mitochondrial import inner membrane translocase
	BMSK0015194.1	ABF51256.1 mitochondrial ribosomal protein S10
	BMSK0011687.1	uncharacterized protein LOC106135912
	BMSK0014249.1	XP 004923132.1 60S ribosome subunit biogenesis protein NIP7 homolog
	BMSK0008672.1	uncharacterized protein CG16817-like
	BMSK0012677.1	XP 021207433.1 ribosomal protein L20 isoform X4
	BMSK0013574.1	XP 004930758.1 acetyl-CoA carboxylase isoform X2
	BMSK0008547.1	Domain of unknown function (DUF4217)
	BMSK0011887.1	XP 004926030.1 S-adenosylmethionine mitochondrial carrier protein
	BMSK0004850.1	ATP-dependent R helicase DDX54-like protein isoform X1
	BMSK0006206.1	ribosomal R -processing protein 7 homolog A
	BMSK0007803.1	inosine-5'-monophosphate dehydrogenase
	BMSK0010038.1	translation factor GUF1 homolog, mitochondrial isoform X1
	BMSK0001808.1	nosine triphosphatase
	BMSK0014835.1	XP 004921859.1 complex I intermediate-associated protein 30, mitochondrial
	BMSK0013594.1	esterase FE4-like isoform X1
	BMSK0013576.1	acetyl-CoA carboxylase isoform X1
	BMSK0007208.1	rR -processing protein FCF1 homolog
	BMSK0011190.1	midasin isoform X1
	BMSK0007461.1	protein MAK16 homolog A
	BMSK0002106.1	angio-associated migratory cell protein
	BMSK0004196.1	probable ATP-dependent R helicase DDX56
	BMSK0010769.1	poly(A) R polymerase, mitochondrial
	BMSK0014201.1	XP 004923158.1 rR 2'-O-methyltransferase fibrillarin
	BMSK0012246.1	XP 004929712.1 T-complex protein 1 subunit gamma
	BMSK0004420.1	ribosome biogenesis protein WDR12 homolog
	BMSK0008386.1	probable ribosome production factor 1
	BMSK0000317.1	putative ATPase family AAA domain-containing protein 3
	BMSK0002142.1	small nuclear ribonucleoprotein polypeptide isoform X1
	BMSK0007807.1	D -(apurinic or apyrimidinic site) lyase
	BMSK0009434.1	RAN binding protein
	BMSK0009488.1	coiled-coil domain-containing protein 86
	BMSK0010768.1	XP 004928363.1 ribosome-recycling factor, mitochondrial
	BMSK0010924.1	dnaJ homolog subfamily C member 2
	BMSK0003996.1	3-hydroxyacyl-CoA dehydrogenase type-2
	BMSK0002221.1	elongation factor Ts
	BMSK0006058.1	hypothetical protein RR46 07074
	BMSK0008363.1	U3 small nucleolar ribonucleoprotein protein IMP3 isoform X1
	BMSK0004383.1	LDLR chaperone boca
	BMSK0010273.1	XP 004932574.1 nucleolar protein 12
	BMSK0007176.1	splicing factor U2af 38 kDa subunit
	BMSK0001904.1	Uncharacterized protein OBRU01 08034
	BMSK0003918.1	uncharacterized protein LOC106131606
	BMSK0012847.1	ruvB-like helicase 1
	BMSK0014831.1	XP 004921862.1 39S ribosomal protein L11, mitochondrial
	BMSK0001630.1	kidney mitochondrial carrier protein 1
	BMSK0014556.1	ABF60228.1 bmp-2
	BMSK0014148.1	grpE protein homolog, mitochondrial
	BMSK0015445.1	XP 004926126.1 39S ribosomal protein L35, mitochondrial
	BMSK0001510.1	glyoxylate reductase/hydroxypyruvate reductase
	BMSK0013220.1	chaperonin
	BMSK0008168.1	polycomb protein l(1)G0020
	BMSK0003866.1	aminomethyltransferase, mitochondrial
	BMSK0006075.1	cleavage and polyadenylation specific factor 5
	BMSK0006208.1	cleavage and polyadenylation specific factor 4
	BMSK0012073.1	AAY86706.1 45 kDa immunophilin FKBP45
	BMSK0015078.1	XP 012551678.1 myb-like protein X isoform X3
	BMSK0007211.1	mitochondrial ribosomal protein L4
	BMSK0014981.1	protein arginine N-methyltransferase 1
	BMSK0010603.1	XP 004928241.1 39S ribosomal protein L17, mitochondrial
	BMSK0012301.1	phosphoribosyl pyrophosphate synthetase
	BMSK0006601.1	uncharacterized protein LOC100216501
	BMSK0010333.1	deoxynucleoside kinase-like isoform X1
	BMSK0011136.1	pentatricopeptide repeat-containing protein 2, mitochondrial-like
	BMSK0001112.1	U5 small nuclear ribonucleoprotein 40 kDa protein
	BMSK0003117.1	squid protein homologue isoform X1
	BMSK0003218.1	eukaryotic initiation factor 4E-2
	BMSK0008634.1	S-formylglutathione hydrolase
	BMSK0009974.1	WD repeat-containing protein 3-like
	BMSK0011591.1	XP 012550870.1 protein NDUFAF4 homolog
	BMSK0015466.1	mitochondrial import receptor subunit TOM40 homolog
	BMSK0008255.1	GPI mannosyltransferase 3
	BMSK0003551.1	T-complex protein 1 subunit alpha
	BMSK0007971.1	zinc finger protein 330 homolog
	BMSK0010852.1	acyl-CoA-binding domain-containing protein 6-like
	BMSK0008762.1	beta-catenin-like protein 1
	BMSK0004652.1	probable ATP-dependent R helicase DDX47 isoform X1
	BMSK0004715.1	eukaryotic translation initiation factor 6
	BMSK0014442.1	WD repeat-containing protein 74
	BMSK0012697.1	serine/arginine repetitive matrix protein 1 isoform X4
	BMSK0003048.1	RCC1-like G exchanging factor-like protein
	BMSK0012706.1	elastase-1
	BMSK0004255.1	D -directed R polymerase I subunit RPA1
	BMSK0014063.1	putative U5 small nuclear ribonucleoprotein 200 kDa helicase
	BMSK0011934.1	mR export protein
	BMSK0010944.1	XP 012546727.2 D replication licensing factor MCM4
	BMSK0009503.1	cell division cycle 2
	BMSK0014731.1	NTF2-like export factor 1
	BMSK0013745.1	Nucleolar protein,Nop52
	BMSK0001389.1	U6 snR -associated Sm-like protein
	BMSK0015910.1	XP 004923441.1 probable 28S ribosomal protein S16, mitochondrial
	BMSK0006214.1	diphosphoinositol polyphosphate phosphohydrolase 1
	BMSK0005800.1	dual specificity protein phosphatase 19-like
	BMSK0015985.1	cleavage and polyadenylation specificity factor subunit 1
	BMSK0009656.1	Nuclear pore component
	BMSK0014316.1
	BMSK0002371.1	phospholipase ABHD3 isoform X1
	BMSK0003793.1	peptidyl-prolyl cis-trans isomerase FKBP2
	BMSK0013213.1
	BMSK0008891.1	mago nashi
	BMSK0001252.1	transcription factor A, mitochondrial
	BMSK0015181.1	XP 004933058.1 zinc finger protein 391 isoform X1
	BMSK0007294.1	uncharacterized protein LOC106106500
	BMSK0007097.1	uncharacterized protein LOC101739219
	BMSK0003451.1	solute carrier family 25 member 40-like isoform X1
	BMSK0008965.1
	BMSK0007793.1	mitochondrial inner membrane protease subunit 1
	BMSK0004497.1	histone R hairpin-binding protein
	BMSK0007860.1	growth arrest and D damage-inducible proteins-interacting protein 1 isoform X2
	BMSK0012060.1
	BMSK0004294.1	TGS domain
	BMSK0008620.1
	BMSK0004349.1	TP53-regulated inhibitor of apoptosis 1
	BMSK0009744.1	28S ribosomal protein S33, mitochondrial isoform X1
	BMSK0006620.1	uncharacterized protein C20orf24 homolog
	BMSK0012016.1	hnRNPA/B-like 28 isoform X2
	BMSK0001343.1	cytochrome c
	BMSK0002461.1	ubiquitin conjugating enzyme E2
	BMSK0002816.1	39S ribosomal protein L53, mitochondrial
	BMSK0010484.1	Essential protein Yae1, N terminal
	BMSK0011243.1	XP 004922429.1 uncharacterized protein LOC101739435
	BMSK0012185.1	stress-induced-phosphoprotein 1-like
	BMSK0003525.1	28S ribosomal protein S24, mitochondrial
	BMSK0005335.1	thioredoxin domain-containing protein 17-like isoform X1
	BMSK0008385.1	methyltransferase-like protein 6
	BMSK0000167.1	peptidylprolyl isomerase isoform X1
	BMSK0003026.1	chromatin accessibility complex protein 1
	BMSK0006292.1	39S ribosomal protein L52, mitochondrial
	BMSK0006172.1
	BMSK0008828.1	peptidyl-prolyl cis-trans isomerase isoform X1
	BMSK0006751.1	small nuclear ribonucleoprotein E
	BMSK0014362.1	ABF51325.1 small nuclear ribonucleoprotein Sm D1
	BMSK0007321.1	D replication complex GINS protein PSF1-like
	BMSK0011671.1	ABF51286.1 FK506-binding protein
	BMSK0006638.1	small nuclear ribonucleoprotein protein F
	BMSK0015660.1	probable small nuclear ribonucleoprotein G
	BMSK0006992.1	arginine/serine-rich splicing factor 7
	BMSK0002286.1	mitochondrial import inner membrane translocase subunit Tim13-like
	BMSK0006455.1	cirhin
	BMSK0006608.1	10 kDa heat shock protein, mitochondrial
	BMSK0006853.1	probable D -directed R polymerase subunit delta
	BMSK0013379.1	ubiquitin-like protein SMT3
	BMSK0003317.1	prefoldin subunit 5
	BMSK0014270.1	XP 012552878.1 mitochondrial intermembrane space translocase subunit Tim10 isoform X1
	BMSK0001097.1	high mobility group protein D
	BMSK0000796.1	protein FAM136A-like
	BMSK0010750.1	XP 004928349.1 39S ribosomal protein L14, mitochondrial
	BMSK0015172.1	ABK42005.1 small nuclear ribonucleoprotein sm d2
	BMSK0007704.1	mitochondrial single-stranded D -binding protein
	BMSK0009073.1	small nuclear ribonucleoprotein Sm D3
	BMSK0004368.1	ubiquitin-conjugating enzyme E2 isoform 1
	BMSK0001230.1	coiled-coil domain-containing protein 47 isoform X2
	BMSK0006253.1	serine palmitoyltransferase 1-like
	BMSK0004930.1	Uncharacterized protein OBRU01 16851
	BMSK0013056.1	formin-binding protein 4-like
	BMSK0007036.1	cysteine and histidine-rich domain-containing protein
	BMSK0002617.1	endonuclease-reverse transcriptase
	BMSK0001460.1	ubiA prenyltransferase domain-containing protein 1 homolog
	BMSK0009081.1	2-methoxy-6-polyprenyl-1,4-benzoquinol methylase mitochondrial
	BMSK0003785.1	splicing factor arginine/serine-rich 6 isoform X5
	BMSK0005580.1
	BMSK0004498.1	high mobility group protein 20A
	BMSK0015702.1	facilitated trehalose transporter Tret1-2 homolog
	BMSK0011951.1	poly(U)-binding-splicing factor half pint
	BMSK0012371.1	uncharacterized protein LOC101740131 isoform X1
	BMSK0008096.1	N-alpha-acetyltransferase 15, NatA auxiliary subunit
	BMSK0006115.1	guanine nucleotide-binding protein-like 1
	BMSK0006753.1	kelch-like protein 2
	BMSK0013154.1	XP 004921720.1 THO complex subunit 7 homolog isoform X1
	BMSK0001907.1	transmembrane and coiled-coil domain-containing protein 1 isoform X1
	BMSK0012871.1
	BMSK0014235.1	ABF51346.1 LRP16 protein
	BMSK0006815.1	chromatin assembly factor 1 subunit B
	BMSK0009061.1	apolipophorin-III precursor
	BMSK0014193.1	ACT66690.2 ecdysone oxidase
	BMSK0005313.1	solute carrier family 2, facilitated glucose transporter member 1
	BMSK0006443.1	Nuclear pore complex protein Nup160-like
	BMSK0012473.1	hypothetical protein KGM 13715
	BMSK0002844.1	cystathionine gamma-lyase
	BMSK0011837.1	isoleucine--tR ligase, mitochondrial isoform X1
	BMSK0000609.1	uncharacterized protein LOC101745012
	BMSK0000608.1	basement membrane-specific heparan sulfate proteoglycan core protein-like isoform X3
	BMSK0011071.1	uncharacterized protein LOC106132531
	BMSK0011965.1	chondroitin sulfate synthase 1
	BMSK0005161.1	tropomodulin-1 isoform X2
	BMSK0011070.1
	BMSK0015035.1	XP 004924104.1 structural maintenance of chromosomes protein 2
	BMSK0000702.1	ABF51351.1 ociad protein isoform 2
	BMSK0013259.1	D mismatch repair protein Msh2 isoform X2
	BMSK0008887.1	minichromosome maintenance complex component 7
	BMSK0004945.1	protein timeless homolog isoform X1
	BMSK0014837.1	XP 004921857.1 probable cardiolipin synthase (CMP-forming)
	BMSK0012388.1	uncharacterized protein LOC106129078
	BMSK0011933.1	XP 021204433.1 D ligase 1
	BMSK0001397.1	dihydrolipoyllysine-residue acetyltransferase component of pyruvate dehydrogenase complex, mitochondrial
	BMSK0000344.1	neuralized-like protein 4
	BMSK0002726.1	serrate R effector molecule homolog isoform X1
	BMSK0001450.1	voltage-dependent anion-selective channel isoform X1
	BMSK0010890.1	XP 004926205.1 transmembrane protein 209
	BMSK0014199.1	regulator of chromosome condensation-like
	BMSK0014357.1	serine hydrolase-like protein
	BMSK0005711.1	inducible nitric oxide synthase-like protein (iNOS-LP), partial
	BMSK0004922.1	dnaJ (Hsp40) homolog 10 isoform X1
	BMSK0009821.1	ATP binding protein
	BMSK0013368.1	Arginine/serine-rich protein PNISR
	BMSK0005368.1	probable peptide chain release factor C12orf65 homolog, mitochondrial
	BMSK0005607.1	ribonuclease P protein subunit p25-like protein isoform X2
	BMSK0010645.1	XP 004928288.1 28S ribosomal protein S2, mitochondrial
	BMSK0002441.1	28S ribosomal protein S11, mitochondrial
	BMSK0015845.1	XP 004933560.1 adenine phosphoribosyltransferase isoform X1
	BMSK0003804.1	tR (adenine(58)-N(1))-methyltransferase catalytic subunit TRMT61A
	BMSK0012337.1	probable tR (guanine(26)-N(2))-dimethyltransferase isoform X1
	BMSK0009365.1	39S ribosomal protein L44, mitochondrial
	BMSK0008163.1	uncharacterized protein LOC101744449 isoform X2
	BMSK0001467.1	uncharacterized protein LOC101738183
	BMSK0013137.1	DNL-type zinc finger protein-like
	BMSK0004893.1	CTP synthase
	BMSK0005491.1	tR (guanine-N(7)-)-methyltransferase
	BMSK0010284.1	ABF51344.1 60S ribosomal protein L7/l12 precursor
	BMSK0001895.1	coiled-coil domain containing 25 protein
	BMSK0006488.1	probable prefoldin subunit 4
	BMSK0009231.1	39S ribosomal protein L18, mitochondrial
	BMSK0001149.1	60 kDa heat shock protein, mitochondrial
	BMSK0011110.1	XP 004933401.1 D -directed R polymerases I, II, and III subunit RPABC1
	BMSK0009007.1	uncharacterized protein LOC106137299
	BMSK0006171.1	cell division cycle 25 isoform X1
	BMSK0001614.1	nucleolar protein 58 isoform X1
	BMSK0015099.1	XP 012551703.1 transcription factor BTF3 homolog 4
	BMSK0011177.1	vasa-like
	BMSK0005472.1	probable protein phosphatase CG10417 isoform X2
	BMSK0010099.1	28 kDa heat- and acid-stable phosphoprotein
	BMSK0008259.1	translation initiation factor 1a
	BMSK0002665.1	guanylate kinase
	BMSK0006836.1	uncharacterized protein LOC101743463
	BMSK0009427.1	zinc finger protein 593 homolog isoform X2
	BMSK0013675.1	Sphingolipid Delta4-desaturase (DES)
	BMSK0008583.1	protein arginine N-methyltransferase 5 isoform X4
	BMSK0001468.1	D -directed R polymerase, mitochondrial
	BMSK0008422.1	amidophosphoribosyltransferase-like isoform X1
	BMSK0009181.1	RRP12-like protein
	BMSK0001545.1	nucleolar MIF4G domain-containing protein 1 homolog
	BMSK0010193.1	luc7-like protein 3
	BMSK0002631.1	aspartyl/asparaginyl beta-hydroxylase isoform X7
	BMSK0006384.1	mpv17-like protein 2
	BMSK0014163.1	protein IWS1 homolog isoform X2
	BMSK0004611.1	28S ribosomal protein S18a, mitochondrial
	BMSK0005101.1	cyclophilin-like protein
	BMSK0006840.1	nesprin-1-like isoform X2
	BMSK0013687.1	protein suppressor of forked
	BMSK0012502.1	pre-rR -processing protein TSR1 homolog
	BMSK0005124.1	RWD domain-containing protein 1 isoform X2
	BMSK0015037.1	XP 021202288.1 nuclear pore complex protein Nup133
	BMSK0000776.1	methionine--tR ligase, cytoplasmic
	BMSK0014178.1	lactoylglutathione lyase
	BMSK0014988.1	translation initiation factor IF-2, mitochondrial isoform X1
	BMSK0004675.1	DH dehydrogenase isoform 2
	BMSK0015781.1	probable 39S ribosomal protein L24, mitochondrial
	BMSK0011209.1	XP 004922405.1 TM2 domain-containing protein almondex
	BMSK0008360.1	R recognition motif. (a.k.a. RRM, RBD, or RNP domain)
	BMSK0014746.1	pre-mR -processing factor 39 isoform X1
	BMSK0000293.1	mediator of R polymerase II transcription subunit 23
	BMSK0004687.1	partner of Y14 and mago isoform X1
	BMSK0009238.1	eukaryotic translation initiation factor 3 subunit A isoform X4
	BMSK0015297.1	uncharacterized protein LOC101739006 isoform X2
	BMSK0011719.1	exportin-2
	BMSK0014899.1	papilin
	BMSK0002854.1	lamin-C
	BMSK0013349.1	XP 004932676.1 protein DPCD
	BMSK0007568.1	mitochondrial ornithine transporter 1 isoform X1
	BMSK0004968.1	zinc finger and BTB domain-containing protein 17 isoform X3
	BMSK0006701.1	c-myc isoform X1
	BMSK0006699.1	glycine cleavage system H protein, mitochondrial-like isoform X2
	BMSK0002951.1	adenylate kinase isoenzyme 6 homolog
	BMSK0004855.1	D-dependent protein deacylase
	BMSK0013159.1	XP 004921725.1 SET and MYND domain-containing protein 5
	BMSK0007007.1	DDB1- and CUL4-associated factor 13
	BMSK0005634.1	39S ribosomal protein L16, mitochondrial isoform X2
	BMSK0007542.1	neurotactin isoform X1
	BMSK0002097.1	OTU domain-containing protein 6B
	BMSK0000671.1	Y+L amino acid transporter 2
	BMSK0002454.1	cyclin E
	BMSK0000519.1	uncharacterized protein LOC105842894
	BMSK0005130.1	proliferation-associated protein 2G4
	BMSK0012085.1	XP 004929618.1 mitochondrial import inner membrane translocase subunit Tim29
	BMSK0005741.1	probable 28S rR (cytosine-C(5))-methyltransferase
	BMSK0008581.1	39S ribosomal protein L51, mitochondrial
	BMSK0006435.1	ubiquitin carboxyl-terminal hydrolase 36
	BMSK0006856.1	acylglycerol kinase, mitochondrial isoform X1
	BMSK0004524.1	notchless protein homolog 1
	BMSK0002457.1	CG10993-like protein
	BMSK0008500.1	will die slowly
	BMSK0004816.1	uncharacterized protein LOC106130280
	BMSK0000780.1	G patch domain-containing protein 4
	BMSK0006603.1	splicing factor 3B subunit 3 isoform X1
	BMSK0009184.1	ischemia/reperfusion inducible protein isoform X1
	BMSK0004295.1	GTP-binding protein 128up
	BMSK0008578.1	surfeit locus protein 6 homolog
	BMSK0006597.1	glutamate-rich WD repeat-containing protein 1
	BMSK0006286.1	zinc finger CCCH domain-containing protein 15 homolog
	BMSK0012564.1	calcium homeostasis endoplasmic reticulum protein isoform X2
	BMSK0013230.1	translation initiation factor 2 gamma subunit
	BMSK0000860.1	ARP6 actin-related protein 6-like protein
	BMSK0008989.1	putative kelch repeat protein
	BMSK0002447.1	ribonucleoside diphosphate reductase small subunit
	BMSK0007786.1	transmembrane and TPR repeat-containing protein CG4050
	BMSK0005981.1	uncharacterized protein LOC101739668 isoform X4
	BMSK0004069.1	tR pseudouridine synthase A, mitochondrial
	BMSK0004419.1	uncharacterized protein LOC101745349
	BMSK0006615.1	U1 small nuclear ribonucleoprotein A isoform X1
	BMSK0003153.1	Protein TBRG4
	BMSK0011860.1	protein LTV1 homolog
	BMSK0002444.1	28S ribosomal protein S29, mitochondrial isoform X1
	BMSK0015088.1	XP 004933015.1 upstream activation factor subunit spp27
	BMSK0008184.1	cleavage and polyadenylation specificity factor subunit CG7185 isoform X3
	BMSK0002645.1	cullin-associated NEDD8-dissociated protein 1
	BMSK0011077.1	mitotic spindle assembly checkpoint protein MAD1
	BMSK0000120.1	importin-7 isoform X1
	BMSK0007771.1	thymidylate synthase isoform 1
	BMSK0011991.1	mitochondrial import inner membrane translocase subunit TIM50-C-like
	BMSK0009722.1	nuclear pore complex protein Nup85
	BMSK0014202.1	XP 012552955.1 WD repeat-containing protein 43
	BMSK0001256.1	uncharacterized protein LOC110385432
	BMSK0015127.1	nucleolar protein 56
	BMSK0006936.1	uncharacterized protein LOC101737592 isoform X1
	BMSK0012510.1	guanine nucleotide-binding protein-like 3 homolog
	BMSK0009480.1	chaperonin subunit 6a zeta
	BMSK0007123.1	chaperonin subunit 4 delta
	BMSK0002633.1	ubiquitin carboxyl-terminal hydrolase
	BMSK0002832.1	cdc2-related kinase
	BMSK0008585.1	polycomb protein Pcl isoform X3
	BMSK0010947.1	ABF51484.1 SUMO-1 activating enzyme
	BMSK0004847.1	inorganic pyrophosphatase
	BMSK0011997.1	metaxin-1-like
	BMSK0005862.1	pre-mR -processing factor 19
	BMSK0014538.1	Programmed cell death protein 11
	BMSK0014537.1	rR biogenesis protein rrp5
	BMSK0005631.1	rR methyltransferase 3, mitochondrial
	BMSK0007497.1	ATP-dependent R helicase SUV3 homolog, mitochondrial
	BMSK0014222.1	ribosomal protein S6 kinase alpha-5 isoform X1
	BMSK0011819.1	probable ATP-dependent R helicase DDX27
	BMSK0015234.1	D replication licensing factor Mcm6-like
	BMSK0007979.1	prolyl 3-hydroxylase sudestada1
	BMSK0002544.1	nucleoporin NUP188 homolog
	BMSK0004329.1	loquacious isoform X5
	BMSK0007628.1	chaperonin containing t-complex polypeptide 1 beta subunit
	BMSK0016056.1	nicotinamide riboside kinase 1
	BMSK0011785.1	XP 004927283.1 flap endonuclease 1
	BMSK0002845.1	uncharacterized protein LOC110386756
	BMSK0001781.1	elongation factor G, mitochondrial
	BMSK0014164.1
	BMSK0005416.1	elongation factor Tu
	BMSK0005845.1	39S ribosomal protein L21, mitochondrial
	BMSK0014319.1	XP 004926499.1 protein mahjong isoform X1
	BMSK0000121.1	importin-7 isoform X1
	BMSK0012951.1	proliferating cell nuclear antigen isoform X1
	BMSK0009340.1	heterochromatin protein 1beta-like protein
	BMSK0005458.1	peptidyl-prolyl cis-trans isomerase H
	BMSK0004659.1	transformer 2 isoform A
	BMSK0000923.1	hepatoma-derived growth factor-related protein 3 isoform X2
	BMSK0001804.1	prohibitin protein WPH isoform X1
	BMSK0010719.1	mitochondrial prohibitin complex protein 2
	BMSK0005282.1	39S ribosomal protein L50, mitochondrial
	BMSK0014640.1	hypothetical protein KGM 00713
	BMSK0010919.1	XP 021203679.1 cleavage and polyadenylation specificity factor 73
	BMSK0011581.1	probable enoyl-CoA hydratase
	BMSK0006037.1	uncharacterized protein LOC106134389
	BMSK0003754.1	AFG3-like protein 2
	BMSK0005581.1	XP 021202736.1 nuclear pore complex protein Nup155
	BMSK0003722.1	COMM domain containing 4
	BMSK0014530.1	retinol dehydrogenase 13-like
	BMSK0008076.1	nucleosome assembly protein isoform X3
	BMSK0002770.1	sulfotransferase family cytosolic 1B member 1 isoform X2
	BMSK0010998.1	threonine--tR ligase, cytoplasmic isoform X2
	BMSK0015855.1	exuperantia
	BMSK0011300.1	selenophosphate synthetase 1
	BMSK0010776.1	ABG54290.1 eukaryotic translation initiation factor 5
	BMSK0008862.1	stromal cell-derived factor 2 precursor
	BMSK0014905.1	tryptophan--tR ligase, cytoplasmic
	BMSK0005570.1	uncharacterized protein LOC106131802 isoform X4
	BMSK0010332.1	DH dehydrogenase ubiquinone Fe-S 8
	BMSK0012061.1	ABF51272.1 WD repeat domain 61
	BMSK0014535.1	XP 004925730.1 EEF1A lysine methyltransferase 1 isoform X1
	BMSK0006250.1	H+ transporting ATP synthase subunit d
	BMSK0006458.1	phosphoglycolate phosphatase-like
	BMSK0010500.1	BAR94546.1 maelstrom
	BMSK0007705.1	transcription factor ETV6
	BMSK0009328.1	SPRY domain
	BMSK0014264.1	heterogeneous nuclear ribonucleoprotein U-like protein 2 isoform X2
	BMSK0010085.1	Ef1alpha-like factor isoform 1
	BMSK0014923.1	bifunctional glutamate/proline--tR ligase isoform X1
	BMSK0006724.1	mitotic checkpoint protein BUB3
	BMSK0007587.1	39S ribosomal protein L22, mitochondrial
	BMSK0004684.1	mitochondrial matrix protein p33
	BMSK0009654.1	nuclear pore complex protein Nup88
	BMSK0006203.1	serine/threonine-protein kinase SMG1-like
	BMSK0010920.1	protein KRI1 homolog isoform X2
	BMSK0004778.1	Uncharacterized protein OBRU01 21943, partial
	BMSK0003314.1	protein CREG1
	BMSK0006972.1	protein fuzzy homolog isoform X2
	BMSK0008966.1	adenylate cyclase type 8
	BMSK0015384.1	uncharacterized protein LOC105390186
	BMSK0014087.1	proteasome 25 kDa subunit
	BMSK0000481.1
	BMSK0004337.1	pyridoxine 5'-phosphate oxidase
	BMSK0002446.1	dolichyl-diphosphooligosaccharide--protein glycosyltransferase subunit 2
	BMSK0001445.1	DH-ubiquinone oxidoreductase 75 kDa subunit, mitochondrial
	BMSK0008017.1	ABQ42597.1 L(B002)
	BMSK0012846.1	dipeptidyl peptidase 3 isoform X1
	BMSK0010399.1	ribosome biogenesis protein BOP1 homolog
	BMSK0005848.1	probable elongator complex protein 2
	BMSK0003557.1	heterogeneous nuclear ribonucleoprotein R isoform X1
	BMSK0003889.1	biotin--protein ligase isoform X1
	BMSK0010917.1	cleavage and polyadenylation specificity factor 73
	BMSK0000226.1	major facilitator superfamily domain-containing protein 6 isoform X2
	BMSK0002043.1	MPN domain-containing protein CG4751 isoform X1
	BMSK0008359.1	uncharacterized protein LOC101738399 isoform X3
	BMSK0013231.1	protein TAPT1 homolog isoform X1
	BMSK0010236.1	D -directed R polymerase III subunit RPC5
	BMSK0001972.1	UPF0598 protein CG30010
	BMSK0007175.1	multidrug resistance-associated protein 1 isoform X2
	BMSK0007174.1	canalicular multispecific organic anion transporter 1-like, partial
	BMSK0007759.1	protein PTCD3 homolog, mitochondrial
	BMSK0002096.1	lysine--tR ligase isoform X2
	BMSK0012102.1	mitochondrial ribosomal protein L2 isoform X1
	BMSK0015124.1	XP 004933029.1 D -directed R polymerase I subunit RPA2
	BMSK0008186.1	D -directed R polymerase III subunit RPC3 isoform X1
	BMSK0004688.1	ATP-dependent R helicase DDX42
	BMSK0013744.1	Ribosomal R processing protein 1-like
	BMSK0000404.1	prostaglandin E synthase 2
	BMSK0004318.1	spliceosomal protein on the X
	BMSK0011204.1	XP 004922402.1 cyclin-related protein FAM58A
	BMSK0006483.1	transcription elongation factor spt5
	BMSK0005575.1	CAD, partial
	BMSK0008138.1	DH dehydrogenase
	BMSK0002205.1	nuclear pore complex protein Nup93-like
	BMSK0007090.1	transmembrane protein 177
	BMSK0010168.1	serine hydroxymethyltransferase isoform X1
	BMSK0008368.1	nuclear pore complex protein Nup205
	BMSK0010074.1	transducin beta-like protein 3
	BMSK0012719.1	tR -dihydrouridine(20a/20b) synthase
	BMSK0004695.1	probable ATP-dependent R helicase DDX52
	BMSK0008633.1	protein Mpv17
	BMSK0000866.1	protein KTI12 homolog
	BMSK0013564.1	putative tR pseudouridine synthase Pus10
	BMSK0006859.1	probable ATP-dependent R helicase DDX28
	BMSK0002069.1	S-adenosyl-L-homocysteine hydrolase
	BMSK0015858.1	5'-methylthioadenosine phosphorylase
	BMSK0001663.1	hypothetical protein KGM 07760
	BMSK0009115.1	probable ATP-dependent R helicase DDX55 homolog
	BMSK0004979.1	arylsulfatase B
	BMSK0000374.1	insulin-like growth factor 2 mR -binding protein 1 isoform X1
	BMSK0014125.1	XP 021203777.1 uncharacterized protein LOC110385215
	BMSK0012296.1	organic cation transporter protein-like isoform X1
	BMSK0009382.1	N-acetylglucosamine-6-sulfatase
	BMSK0009271.1	eukaryotic translation initiation factor 4H
	BMSK0001872.1	uncharacterized protein C05D11.1-like
	BMSK0002385.1	nodal modulator 1
	BMSK0008824.1	twinkle protein, mitochondrial
	BMSK0009828.1	dynein assembly factor 5, axonemal
	BMSK0010400.1	XP 012552174.1 mitochondrial intermembrane space import and assembly protein 40-like
	BMSK0005536.1	mucin-3A
	BMSK0009160.1	malate dehydrogenase, mitochondrial
	BMSK0000093.1	protein RCC2 homolog
	BMSK0007547.1	eukaryotic translation initiation factor 3 subunit M
	BMSK0005901.1	uncharacterized protein LOC106142738
	BMSK0002708.1	zinc finger protein on ecdysone puffs-like
	BMSK0015852.1	proteasome zeta subunit
	BMSK0003182.1	D replication licensing factor Mcm3
	BMSK0006074.1	28S ribosomal protein S35, mitochondrial
	BMSK0014459.1	T-complex protein 1 subunit eta isoform X2
	BMSK0011497.1	tR (cytosine(34)-C(5))-methyltransferase
	BMSK0004582.1	R m5u methyltransferase
	BMSK0009509.1	asparagine--tR ligase, cytoplasmic
	BMSK0010217.1	Protein HGV2
	BMSK0005526.1	A-kinase anchor protein 1, mitochondrial isoform X1
	BMSK0013366.1	XP 004932690.1 arginine/serine-rich protein PNISR isoform X1
	BMSK0004496.1	exportin-6
	BMSK0003276.1	eIF2B-alpha protein
	BMSK0009882.1	uridine 5'-monophosphate synthase
	BMSK0014781.1	claspin homolog, partial
	BMSK0007096.1	mitochondrial import receptor subunit TOM70
	BMSK0015799.1	XP 004933537.1 uncharacterized protein LOC101744771 isoform X2
	BMSK0005331.1	THO complex subunit 6
	BMSK0013466.1	XP 004930707.1 THAP domain-containing protein 1
	BMSK0008758.1	DTW domain-containing protein 1
	BMSK0012115.1	mitochondrial inner membrane protein OXA1L
	BMSK0012665.1	hypothetical protein RR46 10949
	BMSK0013256.1	XP 004932635.1 3-ketodihydrosphingosine reductase
	BMSK0008516.1	serine/threonine protein phosphatase 6
	BMSK0004943.1	U3 small nucleolar R -associated protein 18 homolog
	BMSK0001974.1	nucleolar protein 10
	BMSK0012796.1	ribosome biogenesis protein BRX1 homolog
	BMSK0004955.1	60S ribosomal export protein NMD3
	BMSK0009470.1	D polymerase V
	BMSK0012720.1	programmed cell death protein 2
	BMSK0004353.1	KRR1 small subunit processome component homolog
	BMSK0006619.1	probable tR N6-adenosine threonylcarbamoyltransferase
	BMSK0009381.1	28S ribosomal protein S15, mitochondrial
	BMSK0012573.1	39S ribosomal protein L47, mitochondrial
	BMSK0015236.1	XP 004921870.1 cell growth-regulating nucleolar protein
	BMSK0010088.1	hypothetical protein KGM 03185
	BMSK0013219.1	TCP-1/cpn60 chaperonin family
	BMSK0013197.1	endothelial-monocyte activating polypeptide II
	BMSK0005363.1	28S ribosomal protein S22, mitochondrial
	BMSK0000743.1	presequence protease, mitochondrial-like
	BMSK0005918.1	ran GTPase-activating protein 1
	BMSK0011625.1	mR transport regulator 3 isoform X3
	BMSK0013479.1	pre-rR -processing protein TSR1 homolog
	BMSK0001751.1	HEAT repeat-containing protein 1 isoform X1
	BMSK0012355.1	nucleolar protein 6
	BMSK0001452.1	zinc finger CCHC domain-containing protein 9 isoform X2
	BMSK0013081.1	bifunctional lysine-specific demethylase and histidyl-hydroxylase NO66
	BMSK0010220.1	small subunit processome component 20 homolog
	BMSK0014237.1	valine--tR ligase isoform X2
	BMSK0015079.1	nucleolar protein 12-like
	BMSK0006618.1	uncharacterized protein LOC106136689
	BMSK0007790.1	exosome complex component RRP45
	BMSK0007070.1	39S ribosomal protein L38, mitochondrial
	BMSK0009476.1	diphthamide synthesis protein
	BMSK0006822.1	spermatogenesis-associated protein 5
	BMSK0008840.1	ribonuclease H2 subunit B
	BMSK0013212.1	monocarboxylate transporter 10
	BMSK0014782.1	beta-1,3-galactosyltransferase 2
	BMSK0015199.1	protein BCCIP homolog
	BMSK0006246.1	threonylcarbamoyladenosine tR methylthiotransferase
	BMSK0001968.1	tR -dihydrouridine(20) synthase
	BMSK0006640.1	large subunit GTPase 1 homolog
	BMSK0003280.1	eukaryotic initiation factor 4B protein
	BMSK0003416.1	probable ATP-dependent R helicase pitchoune
	BMSK0003789.1	39S ribosomal protein L19, mitochondrial
	BMSK0010483.1	methyltransferase-like protein 25 isoform X2
	BMSK0001846.1	transcription elongation factor S-II
	BMSK0008804.1	transcription factor E2F7
	BMSK0014919.1	ribosomal R processing protein 36 homolog
	BMSK0006730.1	translin-associated protein X
	BMSK0005413.1	kelch domain-containing protein 10 homolog
	BMSK0008466.1	deoxynucleotidyltransferase terminal-interacting protein 2
	BMSK0012299.1	XP 012551453.1 ankyrin repeat domain-containing protein 12
	BMSK0003156.1	hypothetical protein KGM 01964
	BMSK0005216.1	protoporphyrinogen oxidase
	BMSK0015112.1	XP 021208157.1 DPH-dependent diflavin oxidoreductase 1 isoform X2
	BMSK0003411.1	WD repeat-containing protein 36 isoform X2
	BMSK0008791.1	eukaryotic translation initiation factor 2A
	BMSK0010040.1	putative ribosomal L1 domain containing 1
	BMSK0010990.1	nicalin-1
	BMSK0001449.1	putative cop9 complex subunit
	BMSK0001391.1	chitinase domain-containing protein 1
	BMSK0003679.1	transketolase
	BMSK0003678.1	Transketolase, C-terminal domain
	BMSK0003838.1	peroxisomal biogenesis factor 3
	BMSK0004526.1	probable R -binding protein 19 isoform X2
	BMSK0013367.1
	BMSK0011011.1	ATP synthase
	BMSK0002507.1	mitochondrial-processing peptidase subunit beta-like
	BMSK0011651.1	endonuclease G, mitochondrial, partial
	BMSK0014088.1	metal transporter CNNM4-like
	BMSK0006205.1	serine/threonine-protein kinase SMG1
	BMSK0001373.1	homeobox protein 5 isoform X8
	BMSK0003263.1	phenylalanyl-tR synthetase beta subunit
	BMSK0005858.1	GTP-binding protein 10 homolog
	BMSK0005013.1	acidic leucine-rich nuclear phosphoprotein 32 family member A isoform X1
	BMSK0000369.1	pyruvate dehydrogenase
	BMSK0014882.1	XP 004921822.1 WD repeat-containing protein 92
	BMSK0009634.1	proline dehydrogenase 1, mitochondrial isoform X2
	BMSK0002149.1	KDEL motif-containing protein 1
	BMSK0008295.1	probable asparagine--tR ligase, mitochondrial
	BMSK0008378.1	uncharacterized protein LOC106708416
	BMSK0002243.1	glycerol-3-phosphate dehydrogenase
	BMSK0001909.1	putative ATP-dependent R helicase DHX33
	BMSK0014560.1	protein CLP1 homolog
	BMSK0004338.1	signal recognition particle receptor beta subunit isoform X1
	BMSK0007224.1	dnaJ homolog subfamily C member 10 isoform X1
	BMSK0002800.1	nicotinate phosphoribosyltransferase isoform X1
	BMSK0012674.1	eIF2B-gamma protein isoform X1
	BMSK0002074.1	39S ribosomal protein L15, mitochondrial
	BMSK0001967.1	transcription factor Dp-1 isoform X1
	BMSK0002427.1	nucleoporin Nup43
	BMSK0011097.1	farnesyl diphosphate synthase 3 isoform X1
	BMSK0014243.1	uncharacterized protein LOC101739009
	BMSK0014736.1	cystathionine beta-synthase-like
	BMSK0006902.1	N-acetylgalactosaminyltransferase, partial
	BMSK0002483.1	protein disulfide-isomerase A6
	BMSK0002820.1	mitochondrial ribonuclease P protein 1 homolog isoform X2
	BMSK0013965.1	XP 004933794.2 zinc finger protein 585B-like
	BMSK0011172.1	probable R -binding protein CG14230
	BMSK0004500.1	cap-specific mR (nucleoside-2'-O-)-methyltransferase 1
	BMSK0001894.1	probable queuine tR -ribosyltransferase isoform X2
	BMSK0013493.1	syntaxin-binding protein 5 isoform X2
	BMSK0000988.1	aspartate--tR ligase, cytoplasmic
	BMSK0007133.1	eukaryotic translation initiation factor 3 subunit K
	BMSK0004967.1	Zinc finger, C2H2 type
	BMSK0007594.1	transaldolase
	BMSK0013910.1	Core histone H2A/H2B/H3/H4
	BMSK0013914.1	Core histone H2A/H2B/H3/H4
	BMSK0007492.1	uncharacterized protein LOC101742063 isoform X3
	BMSK0000191.1	Ndr family
	BMSK0004390.1	cell cycle checkpoint protein RAD17 isoform X3
	BMSK0006377.1	methionine sulfoxide reductase
	BMSK0000155.1	calcium-binding mitochondrial carrier protein SCaMC-2 isoform X2
	BMSK0016011.1	UDP-glucosyltransferase precursor
	BMSK0012568.1	putative uncharacterized protein DDB G0282133
	BMSK0006475.1	tether containing UBX domain for GLUT4
	BMSK0004224.1	lipase 1-like
	BMSK0002704.1	probable leucine--tR ligase, mitochondrial
	BMSK0007102.1	CRM1
	BMSK0007126.1	ribonucleoside-diphosphate reductase large subunit isoform X1
	BMSK0005644.1	D polymerase delta catalytic subunit
	BMSK0006399.1	nucleolar GTP-binding protein 2
	BMSK0005846.1	regulator of telomere elongation helicase 1 homolog isoform X2
	BMSK0004415.1	D repair protein RAD50
	BMSK0015921.1	structure-specific endonuclease subunit SLX4
	BMSK0012177.1	elongator complex protein 1
	BMSK0002642.1	probable ATP-dependent R helicase Dbp73D
	BMSK0013500.1	probable ATP-dependent R helicase DDX10
	BMSK0006418.1	uncharacterized protein C05D11.9
	BMSK0013136.1	XP 012543924.1 MMS19 nucleotide excision repair protein homolog
	BMSK0010950.1	protein AATF
	BMSK0009815.1	U3 small nucleolar R -associated protein 14 homolog C
	BMSK0002758.1	71 kDa protein
	BMSK0006433.1	probable ATP-dependent R helicase DDX20
	BMSK0012219.1	isoleucine--tR ligase, cytoplasmic
	BMSK0006617.1	uncharacterized protein LOC100286771 isoform X1
	BMSK0001812.1	Golgi apparatus protein 1
	BMSK0001406.1	peptidyl-prolyl cis-trans isomerase-like 4
	BMSK0012150.1	XP 021205945.1 tyrosine--tR ligase, cytoplasmic-like
	BMSK0009600.1	CCR4-NOT transcription complex subunit 10-like
	BMSK0007619.1	anaphase-promoting complex subunit 4
	BMSK0001760.1	beta-lactamase-like protein 2 homolog isoform X1
	BMSK0006908.1	protein KBP homolog
	BMSK0011897.1	beta-tubulin
	BMSK0007543.1	heat shock protein 75 kDa, mitochondrial-like
	BMSK0005650.1	adenylate kinase 9 isoform X2
	BMSK0011140.1	coiled-coil domain-containing protein 112-like
	BMSK0003413.1	glucosidase 2 subunit beta-like
	BMSK0007618.1	COP9 signalosome complex subunit 3 isoform X1
	BMSK0012116.1	putative U3 small nucleolar R -associated protein
	BMSK0001242.1	glutathione S-transferase C-terminal domain-containing protein homolog
	BMSK0015461.1	XP 012546223.1 U3 small nucleolar ribonucleoprotein protein MPP10 isoform X1
	BMSK0004513.1	THO complex subunit 5 homolog
	BMSK0005521.1	pre-rR processing protein FTSJ3
	BMSK0006211.1	nucleolar protein 11
	BMSK0006406.1	CDT1
	BMSK0011210.1	bromodomain-containing protein DDB G0270170-like isoform X2
	BMSK0012176.1	XP 004929655.1 39S ribosomal protein S30, mitochondrial
	BMSK0006566.1	uncharacterized protein LOC101744765 isoform X1
	BMSK0010625.1	XP 004928264.1 NEDD8-activating enzyme E1 regulatory subunit
	BMSK0008348.1	nudC domain-containing protein 1
	BMSK0008661.1	bystin isoform X1
	BMSK0007621.1	probable dolichyl pyrophosphate Glc1Man9Glc c2 alpha-1,3-glucosyltransferase
	BMSK0010079.1	DID protein isoform X1
	BMSK0014122.1	XP 004926344.1 putative Dol-P-Glc:Glc(2)Man(9)Glc c(2)-PP-Dol alpha-1,2-glucosyltransferase
	BMSK0013591.1	XP 012549834.1 scavenger receptor class B member 1
	BMSK0010035.1	protein SDA1 homolog
	BMSK0003948.1	PIN2/TRF1-interacting protein
	BMSK0011257.1	3-hydroxy-3-methylglutaryl-CoA synthase
	BMSK0013111.1	Uncharacterized protein OBRU01 08225
	BMSK0012334.1	XP 004925050.1 protein FAM172A
	BMSK0001825.1	tR -dihydrouridine(47) synthase
	BMSK0000196.1	heparanase-like protein
	BMSK0003049.1	centromere/kinetochore protein zw10 homolog
	BMSK0012339.1	XP 004925056.1 conserved oligomeric Golgi complex subunit 5
	BMSK0016070.1
	BMSK0001150.1	adenosine kinase
	BMSK0009866.1	CPL (NUC119) domain
	BMSK0009867.1
	BMSK0009869.1	hypothetical protein OBRU01 08954
	BMSK0015277.1	protein SHQ1 homolog
	BMSK0002251.1	Arginine methyltransferase 3
	BMSK0008548.1	probable ATP-dependent R helicase CG8611
	BMSK0015804.1	XP 021208540.1 TIMELESS-interacting protein
	BMSK0005326.1	uncharacterized protein LOC106138168
	BMSK0000891.1	nucleolin
	BMSK0001115.1	Nucleolar pre-ribosomal-associated protein 1
	BMSK0012988.1	putative rR methyltransferase
	BMSK0013352.1	Testis-expressed sequence 10 protein-like protein
	BMSK0005460.1	25S rR (cytosine-C(5))-methyltransferase nop2
	BMSK0002134.1	nucleolar complex protein 2 homolog
	BMSK0005442.1	heat shock protein 70-14
	BMSK0009134.1	leucine-rich repeat-containing protein 47-like
	BMSK0013115.1	XP 021203221.1 methionine synthase reductase isoform X1
	BMSK0001187.1	protein MCM10 homolog isoform X1
	BMSK0011171.1	XP 004922386.1 28S ribosomal protein S9, mitochondrial
	BMSK0006480.1	megator
	BMSK0007688.1	apoptosis inhibitor 5
	BMSK0004523.1	something about silencing protein 10-like
	BMSK0009864.1	putative regulator of ribosome biosynthesis
	BMSK0011909.1	nucleolar protein 9 isoform X1
	BMSK0003183.1	suppressor of SWI4 1 homolog
	BMSK0008139.1	R -binding protein 28
	BMSK0014335.1	DKCLD (NUC011) domain
	BMSK0005259.1
	BMSK0004668.1	probable R 3'-terminal phosphate cyclase-like protein
	BMSK0001898.1	AAA domain
	BMSK0005068.1	putative methyltransferase C9orf114
	BMSK0006592.1	p21-activated protein kinase-interacting protein 1-like
	BMSK0014080.1	interleukin enhancer binding factor isoform X2
	BMSK0006704.1	dimethyladenosine transferase 1, mitochondrial
	BMSK0005327.1	tetratricopeptide repeat protein 27
	BMSK0008955.1	periodic tryptophan protein 1 homolog
	BMSK0015856.1	exosome complex component RRP41
	BMSK0002068.1	importin subunit beta-1
	BMSK0014749.1	XP 012544445.2 39S ribosomal protein L37, mitochondrial
	BMSK0002082.1	neuroguidin
	BMSK0005946.1	uncharacterized protein LOC101743619
	BMSK0000862.1	T-complex protein 1 subunit epsilon
	BMSK0002717.1	casein kinase 2 alpha subunit isoform X1
	BMSK0001734.1	la protein homolog
	BMSK0009233.1
	BMSK0008209.1	WD repeat-containing protein 18
	BMSK0006571.1	ATP-dependent R helicase p62-like
	BMSK0002056.1	uncharacterized protein LOC101744334
	BMSK0006062.1	ruvB-like 2
	BMSK0015113.1	XP 021208120.1 Y+L amino acid transporter 2 isoform X1
	BMSK0014666.1	RRP15-like protein
	BMSK0014703.1	XP 004924554.1 D -directed R polymerases I and III subunit RPAC1 isoform X1
	BMSK0005683.1	WD repeat-containing protein 46
	BMSK0003910.1	adenylate cyclase type 10
	BMSK0015186.1	equilibrative nucleoside transporter 2 isoform X2
	BMSK0009759.1	Galactosyltransferase
	BMSK0005938.1	altered inheritance of mitochondria protein 21 isoform X2
	BMSK0010114.1	evolutionarily conserved signaling intermediate in Toll pathway, mitochondrial
	BMSK0004346.1	ESF1 homolog
	BMSK0007550.1	cysteine--tR ligase, cytoplasmic
	BMSK0009261.1	zinc finger HIT domain-containing protein 2
	BMSK0007597.1	chromatin-remodeling complex ATPase chain Iswi isoform X1
	BMSK0012659.1	THUMP domain-containing protein 1
	BMSK0004685.1	zinc finger CCHC domain-containing protein 4
	BMSK0007582.1	uncharacterized protein LOC106131182
	BMSK0004920.1	tR (guanine-N(7)-)-methyltransferase non-catalytic subunit wuho
	BMSK0003844.1	SAP domain-containing ribonucleoprotein
	BMSK0001494.1	XP 004924439.1 glyoxylate reductase/hydroxypyruvate reductase isoform X1
	BMSK0004879.1	short-chain dehydrogenease/reductase-like protein
	BMSK0005102.1	methylthioribose-1-phosphate isomerase
	BMSK0005647.1	endoplasmic reticulum resident protein 44
	BMSK0004071.1	uncharacterized protein LOC106110164
	BMSK0002084.1	carbonyl reductase
	BMSK0006764.1	fatty acid synthase 2, partial
	BMSK0013444.1	AFC01222.1 DnaJ-8
	BMSK0007527.1	39S ribosomal protein L28, mitochondrial
	BMSK0013365.1	dehydrodolichyl diphosphate syntase complex subunit Nus1
	BMSK0007308.1	ELAV-like protein 1 isoform X1
	BMSK0005340.1	R polymerase I-specific transcription initiation factor RRN3 isoform X1
	BMSK0008347.1	box C/D snoR protein 1
	BMSK0012411.1	POX-J
	BMSK0006979.1	Male sterility protein
	BMSK0008842.1	gag-polypeptide of LTR copia-type
	BMSK0010734.1	XP 004934365.2 4-coumarate--CoA ligase 1
	BMSK0003100.1	scavenger receptor class B member 1-like isoform X1
	BMSK0008829.1	C-type lectin 16 precursor
	BMSK0004631.1	membrane-bound alkaline phosphatase-like
	BMSK0000710.1	proton-coupled amino acid transporter 1-like isoform X2
	BMSK0004640.1	CBP80/20-dependent translation initiation factor isoform X1
	BMSK0012765.1	XP 004926652.1 lipoamide acyltransferase component of branched-chain alpha-keto acid dehydrogenase complex, mitochondrial
	BMSK0015169.1	glycerol-3-phosphate acyltransferase 1, mitochondrial isoform X1
	BMSK0012541.1	bifunctional 3'-phosphoadenosine 5'-phosphosulfate synthase isoform X1
	BMSK0004805.1	5-aminolevulinate synthase, nonspecific, mitochondrial
	BMSK0013011.1	BAW33842.1 MOCS1AB
	BMSK0008102.1	gag-polypeptide of LTR copia-type
	BMSK0010428.1	XP 012552489.1 xanthine dehydrogenase 1-like, partial
	BMSK0014495.1	XP 021203363.1 carboxyl/cholinesterase 6 isoform X1
	BMSK0012548.1	peroxidase-like
	BMSK0001395.1	AII79417.1 integrin beta5
	BMSK0004932.1
	BMSK0002272.1	zinc finger protein chinmo
	BMSK0001500.1	nucleoside diphosphate-linked moiety X motif 8-like
	BMSK0008154.1	juvenile hormone epoxide hydrolase-like protein 2 isoform X1
	BMSK0012641.1	XP 004931947.1 elongation of very long chain fatty acids protein AAEL008004 isoform X1
	BMSK0013715.1	XP 004926017.1 fatty acyl-CoA reductase wat isoform X2
	BMSK0012638.1	XP 004931952.1 elongation of very long chain fatty acids protein AAEL008004 isoform X2
	BMSK0006164.1	uncharacterized protein LOC101740721
	BMSK0008475.1	juvenile hormone esterase-like
	BMSK0006338.1
	BMSK0008299.1	Krueppel homolog 2
	BMSK0006339.1	protein cueball
	BMSK0001831.1	abhydrolase domain-containing protein 2
	BMSK0001843.1	C-type lectin 5 precursor
	BMSK0008912.1	uncharacterized protein LOC101742528
	BMSK0010674.1	XP 004928429.1 probable 4-coumarate--CoA ligase 1 isoform X1
	BMSK0010535.1	xanthine dehydrogenase/oxidase-like isoform X1
	BMSK0006986.1	ABC-2 type transporter
	BMSK0006532.1	cuticular protein hypothetical 18 precursor
	BMSK0001093.1	calpain-11-like
	BMSK0012616.1	cuticular protein RR-2 motif 91 precursor
	BMSK0001285.1	Spatzle 3
	BMSK0006579.1
	BMSK0012121.1	XP 004929635.1 alpha-tocopherol transfer protein-like
	BMSK0013748.1	sid-1-related gene1 precursor
	BMSK0015800.1	XP 004933539.1 mediator of R polymerase II transcription subunit 20
	BMSK0006529.1	cuticular protein hypothetical 21 precursor
	BMSK0014728.1	XP 012544415.1 dimethyladenosine transferase 2, mitochondrial
	BMSK0009186.1	ceramide synthase 5-like
	BMSK0007454.1
	BMSK0007586.1	cytochrome b-c1 complex subunit 8
	BMSK0000708.1	hepatic leukemia factor isoform X10
	BMSK0003833.1	deoxyuridine 5'-triphosphate nucleotidohydrolase
	BMSK0013039.1	EF hand
	BMSK0007127.1	barrier-to-autointegration factor B
	BMSK0008994.1	probable pseudouridine-5'-phosphatase
	BMSK0011606.1	transmembrane protein 14C
	BMSK0014253.1	uncharacterized protein LOC106708047
	BMSK0007163.1	uncharacterized protein LOC106714088
	BMSK0002821.1	peptidyl-prolyl cis-trans isomerase
	BMSK0003121.1	putative DH=ubiquinone dehydrogenase
	BMSK0002896.1	DH dehydrogenase 1 alpha subcomplex subunit 5
	BMSK0002445.1	H+ transporting ATP synthase subunit g
	BMSK0014531.1	uncharacterized protein LOC106120002
	BMSK0013386.1	UPF0414 transmembrane protein-like protein
	BMSK0007455.1	nose resistant to fluoxetine protein 6-like
	BMSK0007453.1	nose resistant to fluoxetine protein 6
	BMSK0007340.1	serine palmitoyltransferase 2
	BMSK0007500.1	39S ribosomal protein L27, mitochondrial
	BMSK0000184.1	uncharacterized protein LOC101741973
	BMSK0005847.1
	BMSK0013294.1	XP 004932659.1 HIG1 domain family member 2A, mitochondrial
	BMSK0011798.1	ABF51371.1 cytochrome c oxidase polypeptide Vb
	BMSK0005625.1	HAP1 N-terminal conserved region
	BMSK0002869.1	ubiquinol-cytochrome C reductase complex 14kD subunit
	BMSK0003287.1	ATP synthase lipid-binding protein, mitochondrial
	BMSK0008144.1	probable ATP-dependent R helicase Dbp45A
	BMSK0013529.1	XP 012549714.1 DJ-1 beta isoform X2
	BMSK0013078.1	pleiotropic regulator 1
	BMSK0014234.1	XP 012552876.1 neutral alpha-glucosidase AB-like isoform X1
	BMSK0004717.1	Calponin homology (CH) domain
	BMSK0013535.1	Putative glycogen
	BMSK0013210.1	organic cation transporter protein isoform X1
	BMSK0014984.1	XP 004924093.1 D damage-binding protein 1
	BMSK0013044.1	cytochrome c oxidase assembly protein COX15 homolog isoform X1
	BMSK0013778.1	dynamin-like 120 kDa protein, mitochondrial
	BMSK0014450.1	eIF2B-beta protein
	BMSK0004399.1	serine/arginine repetitive matrix protein 1
	BMSK0011955.1	Calcium-binding EGF domain
	BMSK0011956.1	collagen and calcium-binding EGF domain-containing protein 1-like
	BMSK0011957.1	Calcium-binding EGF domain
	BMSK0005624.1	trafficking kinesin-binding protein milt isoform X5
	BMSK0012254.1	mitochondrial aldehyde dehydrogenase
	BMSK0011953.1	XP 012545245.1 fibrillin-1, partial
	BMSK0006183.1	uncharacterized protein LOC101735496
	BMSK0014516.1	ABF51465.1 mitochondrial ATP synthase coupling factor 6
	BMSK0013014.1	XP 004927506.1 uncharacterized protein LOC101744756
	BMSK0011958.1	XP 004925448.1 uncharacterized protein LOC101736566
	BMSK0012181.1	D replication licensing factor MCM4-like, partial
	BMSK0010772.1	XP 021205003.1 thyroid adenoma-associated protein homolog
	BMSK0000027.1	UDP-sugar transporter UST74c
	BMSK0014382.1	programmed cell death protein 4-like
	BMSK0002979.1	alcohol dehydrogenase precursor
	BMSK0001520.1	mitochondrial 2-oxoglutarate/malate carrier protein isoform X2
	BMSK0008873.1	choline-phosphate cytidylyltransferase B-like isoform X3
	BMSK0008425.1	cysteine-rich with EGF-like domain protein 2 isoform X1
	BMSK0004044.1	uncharacterized protein LOC105841580
	BMSK0004516.1	Uncharacterized protein OBRU01 05951, partial
	BMSK0002771.1	sulfotransferase 1C3-like
	BMSK0012276.1	DH dehydrogenase (ubiquinone) 1 alpha subcomplex, 13
	BMSK0013222.1	ABF51369.1 H+ transporting ATP synthase O subunit isoform 2
	BMSK0013693.1	fatty-acyl CoA reductase 2
	BMSK0006195.1	alanine aminotransferase 1
	BMSK0006669.1	uncharacterized protein LOC101738416
	BMSK0012517.1	(6-4) photolyase
	BMSK0011875.1	probable aminopeptidase NPEPL1
	BMSK0009844.1	Protein penguin
	BMSK0012481.1	XP 004924792.1 elongation of very long chain fatty acids protein 6
	BMSK0006476.1	dehydrogenase/reductase SDR family member 4
	BMSK0002199.1	retinaldehyde-binding protein 1 isoform X1
	BMSK0009242.1	nose resistant to fluoxetine protein 6-like
	BMSK0003143.1	synaptic vesicle glycoprotein 2B
	BMSK0009843.1	CPL (NUC119) domain
	BMSK0015725.1	facilitated trehalose transporter Tret1-like
	BMSK0004959.1	H+ transporting ATP synthase beta subunit isoform 1
	BMSK0005128.1	D polymerase theta
	BMSK0009846.1	U3 small nucleolar R -interacting protein 2
	BMSK0014324.1	XP 004926478.1 H/ACA ribonucleoprotein complex subunit 4
	BMSK0008421.1	phosphoribosylaminoimidazole carboxylase
	BMSK0002123.1	mitochondrial import inner membrane translocase subunit Tim21
	BMSK0002148.1	39S ribosomal protein L3, mitochondrial
	BMSK0004387.1	protein spinster isoform X4
	BMSK0007978.1	tR =m(4)X modification enzyme TRM13 homolog isoform X2
	BMSK0004964.1	venom allergen 5-like isoform X1
	BMSK0003453.1	DP-dependent malic enzyme
	BMSK0007020.1	protein sly1 homolog
	BMSK0009930.1	E2/E3 hybrid ubiquitin-protein ligase UBE2O
	BMSK0005152.1	GTP-binding protein SAR1b
	BMSK0014982.1	XP 004924096.1 b(0,+)-type amino acid transporter 1 isoform X1
	BMSK0011285.1	GTP-binding protein Rit2, partial
	BMSK0014401.1	16 kDa salivary protein
	BMSK0010612.1	uncharacterized protein LOC101745966 isoform X2
	BMSK0010506.1	XP 004928165.1 ADP-dependent glucokinase
	BMSK0001954.1	transmembrane protein 189 isoform X2
	BMSK0004987.1	uncharacterized protein LOC101745027 isoform X2
	BMSK0014501.1	protein YIF1A isoform X1
	BMSK0007852.1	D supercoiling factor
	BMSK0001814.1	manganese-transporting ATPase 13A1
	BMSK0012035.1	GO=0000166
	BMSK0005584.1	XP 004924867.1 probable serine hydrolase
	BMSK0011356.1	ACL54971.1 ACHI protein, partial
	BMSK0012051.1	XP 004926752.1 probable bifunctional methylenetetrahydrofolate dehydrogenase/cyclohydrolase 2 isoform X2
	BMSK0000480.1	tudor staphylococcus/micrococcal nuclease
	BMSK0009810.1	uncharacterized protein LOC101746409 isoform X3
	BMSK0002153.1	DnaJ-3
	BMSK0010724.1	hypoxia up-regulated protein 1
	BMSK0009933.1	deoxyhypusine hydroxylase/monooxygenase
	BMSK0008970.1	dolichyl-diphosphooligosaccharide--protein glycosyltransferase subunit STT3A
	BMSK0004106.1	ATP synthase
	BMSK0002459.1	uncharacterized protein LOC101739222
	BMSK0010770.1	XP 021205004.1 uncharacterized protein LOC110385582
	BMSK0012180.1	XP 012548778.1 A disintegrin and metalloproteinase with thrombospondin motifs 7
	BMSK0003809.1	uncharacterized protein LOC106131668
	BMSK0015133.1	XP 012551701.1 serine/arginine-rich splicing factor 4
	BMSK0015806.1	XP 012552046.1 6-phosphogluconolactonase isoform X1
	BMSK0008750.1	D(P) transhydrogenase, mitochondrial
	BMSK0002950.1	protein disulfide-isomerase like protein ERp57 precursor
	BMSK0008767.1	UDP-glucose=glycoprotein glucosyltransferase
	BMSK0003316.1	glutaredoxin 3
	BMSK0002570.1	hypothetical protein KGM 01714
	BMSK0008776.1	glutamine--fructose-6-phosphate aminotransferase
	BMSK0008605.1	succinyl-CoA ligase
	BMSK0012509.1	calreticulin
	BMSK0012350.1	XP 021202899.1 AP-3 complex subunit beta-2
	BMSK0001443.1	brefeldin A-inhibited guanine nucleotide-exchange protein 3
	BMSK0016001.1	XP 004924342.1 uncharacterized protein LOC101740912
	BMSK0012732.1	cuticular protein RR-1 motif 42 precursor
	BMSK0014834.1	PH domain-containing protein DDB G0287875-like
	BMSK0003999.1	D replication licensing factor Mcm2 isoform X1
	BMSK0003417.1	probable ATP-dependent R helicase pitchoune
	BMSK0006606.1	esterase FE4
	BMSK0007467.1	Putative undecaprenyl diphosphate synthase
	BMSK0007466.1	dehydrodolichyl diphosphate synthase
	BMSK0000283.1	uncharacterized protein LOC692928
	BMSK0012208.1	XP 004929686.2 uncharacterized protein LOC101741360
	BMSK0003444.1
	BMSK0009841.1	ribosome biogenesis regulatory protein homolog
	BMSK0015636.1	facilitated trehalose transporter Tret1-like isoform X2
	BMSK0007471.1	aspartylglucosaminidase
	BMSK0003335.1	antennapedia homologue protein isoform X1
	BMSK0013963.1	XP 004934354.2 probable ATP-citrate synthase subunit 1
	BMSK0013964.1	XP 021208590.1 ATP-citrate synthase-like, partial
	BMSK0006101.1	clathrin coat assembly protein AP180
	BMSK0002201.1
	BMSK0014594.1	acyl-CoA delta-11 desaturase isoform 1
	BMSK0002070.1	succinate dehydrogenase assembly factor 4, mitochondrial-like
	BMSK0006048.1
	BMSK0009461.1	cellular retinoic acid binding protein
	BMSK0001492.1	zinc finger HIT domain-containing protein 1-like
	BMSK0006561.1
	BMSK0000195.1	FK506-binding protein precursor
	BMSK0001797.1	mannose-P-dolichol utilization defect 1 protein
	BMSK0004047.1
	BMSK0011579.1	XP 004922580.1 DH dehydrogenase
	BMSK0009338.1	NIPS P protein
	BMSK0012451.1	AFG30048.1 heat shock protein 90 beta
	BMSK0009371.1	phosphatidylinositol transfer protein alpha isoform
	BMSK0010036.1	roadblock domain-containing protein 3
	BMSK0008296.1	Uncharacterised protein family (UPF0121)
	BMSK0009183.1	mitochondrial inner membrane protease subunit 2
	BMSK0014802.1	ABF51438.1 transcription initiation factor IIA gamma chain
	BMSK0005555.1	DH dehydrogenase
	BMSK0001244.1	ABD36234.2 mitochondrial ribosomal protein L41
	BMSK0004385.1
	BMSK0014768.1	XP 004924582.1 cyclin-dependent kinase 20-like
	BMSK0007529.1	G1/S-specific cyclin-D3
	BMSK0007530.1	cyclin D
	BMSK0013915.1	C-terminus of histone H2A
	BMSK0000905.1	mucin-2-like
	BMSK0013068.1	carboxyl/cholinesterase 1 precursor
	BMSK0002607.1	odorant binding protein LOC100301497 precursor
	BMSK0008915.1	PAP2 superfamily
	BMSK0009286.1	glucose dehydrogenase
	BMSK0001132.1	R binding protein 1-C
	BMSK0009635.1
	BMSK0015625.1
	BMSK0010722.1	forkhead box protein N3-like isoform X5
	BMSK0007338.1	reticulon-1-A isoform X2
	BMSK0001160.1	fatty-acid amide hydrolase 2-like isoform X1
	BMSK0004543.1	Interferon-induced 6-16 family
	BMSK0011954.1	fibrillin-1-like
	BMSK0012124.1	uncharacterized protein LOC101735428 isoform X2
	BMSK0005280.1	integrin alpha-PS2
	BMSK0004941.1	glycerol-3-phosphate dehydrogenase-1
	BMSK0007472.1	ribosomal protein S2 isoform X1
	BMSK0005281.1	protein KIAA0100
	BMSK0000903.1	uncharacterized protein LOC106129482
	BMSK0000492.1	phosphogluconate dehydrogenase, partial
	BMSK0001089.1	microsomal triglyceride transfer protein, partial
	BMSK0009905.1	uncharacterized protein LOC105841736
	BMSK0006363.1	protein disulfide isomerase precursor
	BMSK0000425.1	polypeptide N-acetylgalactosaminyltransferase 11
	BMSK0015126.1	D -directed R polymerase I subunit RPA2 isoform X2
	BMSK0006126.1	regulator of G-protein signaling 7
	BMSK0006917.1	sodium-dependent nutrient amino acid transporter 1-like isoform X1
	BMSK0002978.1	15-hydroxyprostaglandin dehydrogenase
	BMSK0012540.1	R -directed D polymerase from mobile element jockey-like
	BMSK0013093.1	XP 012552250.1 serum response factor homolog
	BMSK0013498.1	XP 012549759.1 syntaxin-binding protein 5 isoform X3
	BMSK0010891.1	XP 012545836.1 endoplasmic reticulum metallopeptidase 1 isoform X1
	BMSK0006049.1	ferrochelatase, mitochondrial-like
	BMSK0009710.1	putative ecdysone oxidase, partial
	BMSK0008658.1	protein tyrosine phosphatase
	BMSK0014561.1
	BMSK0012731.1	cuticular protein RR-1 motif 43 precursor
	BMSK0009506.1	glucosylceramidase-like isoform X2
	BMSK0003964.1	UDP-glucosyltransferase precursor
	BMSK0007182.1	R polymerase II transcriptional coactivator
	BMSK0000989.1	tR synthetases class II (D, K and N)
	BMSK0000857.1	cytochrome c oxidase subunit 7C, mitochondrial-like
	BMSK0000194.1	KWMTBOMO00483
	BMSK0002852.1	insulin-like receptor
	BMSK0010635.1	uncharacterized protein LOC106139518
	BMSK0009578.1	phosphatidylethanolamine-binding protein homolog F40A3.3-like
	BMSK0011298.1	XP 021206601.1 uncharacterized protein LOC110385973
	BMSK0011620.1	XP 004927696.1 UDP-glucose 4-epimerase
	BMSK0012263.1	Tropomyosin like
	BMSK0015623.1	calsyntenin-1
	BMSK0008748.1	glucosyltransferase rumi homolog isoform X1
	BMSK0015731.1	facilitated trehalose transporter Tret1-2 homolog
	BMSK0002999.1	sulfite oxidase isoform X1
	BMSK0011390.1	XP 004927391.1 dolichyl-diphosphooligosaccharide--protein glycosyltransferase subunit DAD1
	BMSK0013108.1	UDP-N-acetylglucosamine transferase subunit ALG13 homolog
	BMSK0015053.1	uncharacterized protein LOC101743520
